# Burst-dependent synaptic plasticity can coordinate learning in hierarchical circuits

Alexandre Payeur<sup>1</sup>• Jordan Guerguiev<sup>2,3</sup>• Friedemann Zenke<sup>4</sup> Blake A. Richards<sup>5,6,7,8\*</sup>• and Richard Naud<sup>1,9,\*</sup>•

**1** uOttawa Brain and Mind Institute, Centre for Neural Dynamics, Department of Cellular and Molecular Medicine, University of Ottawa, Ottawa, ON, Canada

**2** Department of Biological Sciences, University of Toronto Scarborough, Toronto, ON, Canada

**3** Department of Cell and Systems Biology, University of Toronto, Toronto, ON, Canada

**4** Friedrich Miescher Institute for Biomedical Research, Basel, Switzerland

**5** Mila, Montréal, QC, Canada

**6** Department of Neurology and Neurosurgery, McGill University, Montréal, QC, Canada

**7** School of Computer Science, McGill University, Montréal, QC, Canada

**8** Learning in Machines and Brains Program, Canadian Institute for Advanced Research, Toronto, ON, Canada

**9** Department of Physics, University of Ottawa, Ottawa, ON, Canada

\* Corresponding authors, email: [rnaud@uottawa.ca](mailto:rnaud@uottawa.ca), [blake.richards@mcgill.ca](mailto:blake.richards@mcgill.ca)

• Equal contributions

## Abstract

Synaptic plasticity is believed to be a key physiological mechanism for learning. It is well-established that it depends on pre and postsynaptic activity. However, models that rely solely on pre and postsynaptic activity for synaptic changes have, to date, not been able to account for learning complex tasks that demand credit assignment in hierarchical networks. Here, we show that if synaptic plasticity is regulated by high-frequency bursts of spikes, then neurons higher in a hierarchical circuit can coordinate the plasticity of lower-level connections. Using simulations and mathematical analyses, we demonstrate that, when paired with short-term synaptic dynamics, regenerative activity in the apical dendrites, and synaptic plasticity in feedback pathways, a burst-dependent learning rule can solve challenging tasks that require deep network architectures. Our results demonstrate that well-known properties of dendrites, synapses, and synaptic plasticity are sufficient to enable sophisticated learning in hierarchical circuits.

## Introduction

The current canonical model of synaptic plasticity in the cortex is based on the co-occurrence of activity on the two sides of the synapse, pre and postsynaptic [1,2]. The occurrence of either long-term depression (LTD) or long-term potentiation (LTP) is controlled by specific features of pre and postsynaptic activity [3–12] and a more global state of neuromodulation [2,13–21]. However, local learning rules by themselves do not provide a guarantee that behavioral metrics will improve. With neuromodulation driven by an external reward/punishment mechanism, this guarantee is achievable [22]. But, such learning is very slow in tasks that require large or deep networks because a global signal provides very limited information to neurons deep in the hierarchy [23–25]. Thus, an outstanding question is (Fig. 1): how can neurons high-up in a hierarchy signal to other neurons — sometimes multiple

synapses lower — whether to engage in LTP or LTD in order to improve behavior [2]? This question is sometimes referred to as the “credit assignment problem”: essentially, how can we assign credit for any errors or successes to neurons that are multiple synapses away from the output [26]?

In machine learning, the credit assignment problem is typically solved with the backpropagation-of-error algorithm (backprop [27]), which explicitly uses gradient information in a biologically implausible manner [25] to calculate synaptic weight updates. Many previous studies have attempted to capture the credit assignment properties of backprop with more biologically plausible implementations in the hope that a biological model could match backprop’s learning performance [25, 28–44]. However, a problem with most of these models is that there is always an implicit assumption that during some phases of learning no sensory stimuli are processed, i.e. the models are not “online” in their learning, which is problematic for both biological plausibility and for potential future development of low-energy neuromorphic computing devices. Moreover, there are several well-established properties of real neurons, including nonlinearities in the apical dendrites [45], short-term synaptic plasticity (STP) [46, 47], and inhibitory microcircuits that are ignored. None of the previous studies successfully incorporated all of these features to perform online credit assignment (Table S1). Furthermore, none of these models captured the frequency dependence of synaptic plasticity, which is a very well-established property of LTP/LTD [6, 8, 9, 48, 49].

As established in non-hierarchical systems, such as the electrosensory lateral line lobe of the electric fish [50–52] or the cerebellum [53], feedback connections on dendrites are well-poised to orchestrate learning [54]. But for credit assignment in hierarchical networks, these connections should obey four constraints: 1) Feedback must *steer* the sign and magnitude of plasticity. 2) Feedback signals from higher-order areas should be *multiplexed* with feedforward signals from lower-order areas so that credit information can percolate down the hierarchy with minimal disruption to sensory information. 3) There should be some degree of *alignment* between feedback connections and feedforward connections. 4) Integration of credit-carrying feedback signals should be close to *linear* and avoid saturation (i.e., feedback signals should be linear with respect to any credit information). Experimental and theoretical work have addressed steering [12, 55], multiplexing [56–59], alignment [34, 41, 60, 61] or linearity [62] in isolation. , often by learning in an offline fashion [34–37, 40, 41, 63, 64], without learning rules based on spikes [28, 30, 35–37, 65] or without learning to solve tasks that necessitate hierarchical processing. But, it remains unclear whether a single set of cellular and subcellular mechanisms can address all four requirements for orchestrating learning in cortical hierarchies efficiently.

Here, we address the credit assignment problem with a spike-based learning rule that models how high-frequency bursts determine the sign of synaptic plasticity [6, 8, 9, 48, 49]. Guided by the underlying philosophy first espoused by the work of Körding and König (2001) [28] that the unique properties of pyramidal neurons may contain a solution to biologically plausible credit assignment, we show that combining properties of apical dendrites [45] with our burst-dependent learning rule allows feedback to steer plasticity. We further show that feedback information can be multiplexed across multiple levels of a hierarchy when feedforward and feedback connections have distinct STP [66, 67]. Using spiking simulations, we demonstrate that these mechanisms can be used to coordinate learning across a hierarchical circuit in a fully online manner. We also show that a coarse-grained equivalent of these dynamical properties will, on average, lead to learning that approximates loss-function gradients as used in backprop. We further show that this biological approximation to loss-function gradients is improved by a burst-dependent learning rule performing the alignment of feedback weights with feedforward weights, as well as recurrent inhibitory connections that linearize credit signals. Finally, we show that networks trained with these mechanisms can learn to classify complex image patterns with high accuracy. Altogether, our work highlights that well-known properties of dendritic excitability, synaptic transmission, short-term synaptic plasticity, inhibitory microcircuits, and burst-dependent synaptic plasticity are sufficient to solve the credit assignment problem in hierarchical networks.

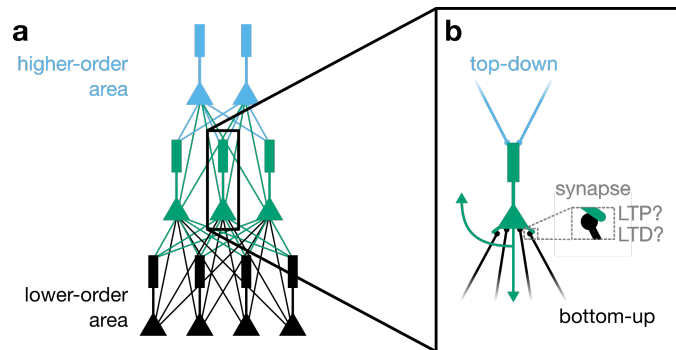

**Figure 1.** The credit assignment problem for hierarchical networks. (a) Illustration of a hierarchical neural network with feedforward and feedback connections. (b) For an orchestration of learning in this network, the representations in higher-level neurons should steer the plasticity of connections at a lower level.

## Results

### A burst-dependent rule enables top-down steering of plasticity

Experimental work has demonstrated that the sign of plasticity can be determined by patterns of pre and postsynaptic activity. The most common formulation of this is spike-timing-dependent plasticity (STDP), wherein the timing of pre and postsynaptic spikes is what determines whether LTP or LTD occurs [4, 68, 69]. However, there is also evidence suggesting that in many circuits, particularly mature ones [70], the principal determinant of plasticity is the level of postsynaptic depolarization, with large depolarization leading to LTP and small depolarization leading to LTD [3, 5–7, 11], which is a direct consequence of the dynamics of N-methyl-D-aspartate receptor (NMDAR)-dependent calcium influx [71]. Importantly, one of the easiest ways to induce large magnitude depolarization in dendrites is via backpropagation of high-frequency bursts of action potentials [72] and, therefore, the degree of postsynaptic bursting controls plasticity [6–9, 49]. Since bursting may be modulated by feedback synapses on apical dendrites [45, 73], feedback could control plasticity in the basal dendrites via control of bursting. Thus, in considering potential mechanisms for credit assignment during top-down supervised learning, the burst-dependence of synaptic plasticity appears to be a natural starting point.

To explore how high-frequency bursting could control learning in biological neural networks, we formulated a burst-dependent plasticity rule as an abstraction of the experimental data. We consider a burst to be any occurrence of at least two spikes with a short (i.e. under 16 ms) interspike interval. Following Ref. [59], we further define an event as either an isolated single spike or a burst. Thus, for a given neuron’s output, there is an event train (similar to a spike train, except that events can be either bursts or single spikes) and a burst train, which comprises a subset of the events (see Methods). We note that these definitions impose a ceiling on the frequency of events of 62.5 Hz, which is well above the typical firing frequency of cortical pyramidal neurons [73, 74]. The learning rule states that the change over time of a synaptic weight between postsynaptic neuron  $i$  and presynaptic neuron  $j$ ,  $dw_{ij}/dt$ , results from a combination of an eligibility trace of presynaptic activity,  $\tilde{E}_j$ , and the potentiating (or depressing) effect of the burst train  $B_i$  (or event train  $E_i$ ) of the postsynaptic cell (Fig. 2a):

$$\frac{dw_{ij}}{dt} = \eta[B_i(t) - \bar{P}_i(t)E_i(t)]\tilde{E}_j(t). \quad (1)$$

The variable  $\bar{P}_i$  controls the relative strength of burst-triggered potentiation and event-triggered depression. To ensure a finite growth of synaptic weights, we set this to a moving average of the proportion of events that are bursts in postsynaptic neuron  $i$ , with a slow ( $\sim 1 - 10$  s) time scale (see Methods). The constant  $\eta$  is the learning rate. The variable  $\bar{P}_i \in [0, 1]$  is an exponential moving average of the proportion of events that are bursts in postsynaptic neuron  $i$ , with a slow ( $\sim 1 - 10$  s) time constant (see

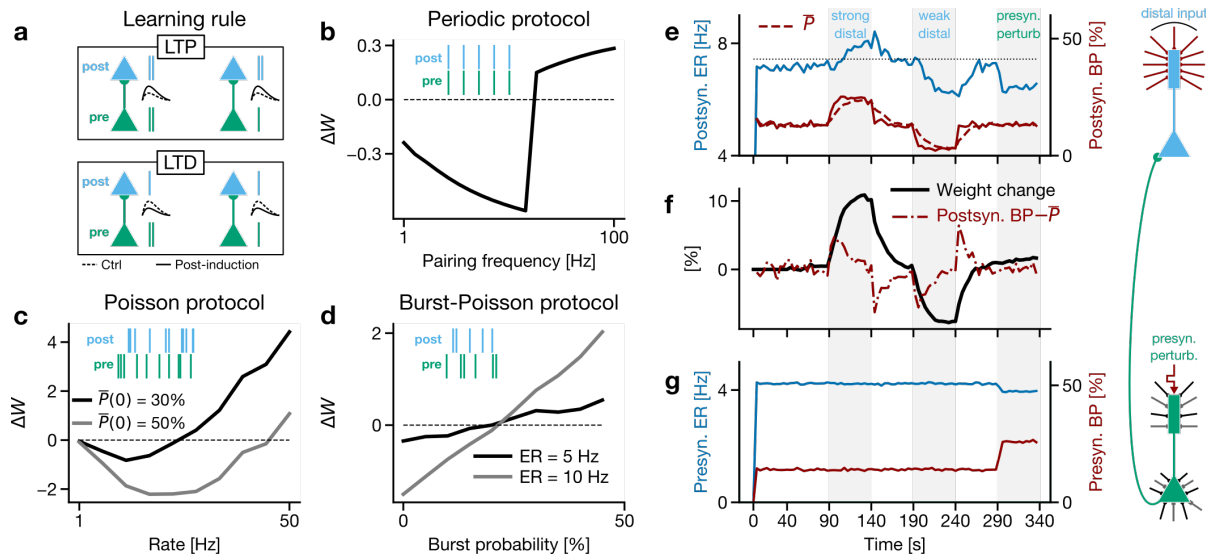

**Figure 2.** Burst-dependent plasticity rule. (a) Schematics of the learning rule. When there is a presynaptic eligibility trace, the occurrence of a postsynaptic burst leads to potentiation (top) whereas an isolated postsynaptic spike leads to depression of the synapse (bottom). (b-d) Net weight change for different pairing protocols. (b) The periodic protocol consisted of 15 sequences of 5 pairings, separated by a 10 s interval. We used pairings with  $t_{\text{post}} = t_{\text{pre}}$ . (c) For the Poisson protocol, the pre and postsynaptic activities were Poisson spike trains with equal rates. The protocol was repeated with different initial time-average burst probabilities ( $\bar{P}$ ). (d) For the burst-Poisson protocol, pre and postsynaptic Poisson events were generated at a fixed rate (ER). For each event, a burst was produced with a probability that varied from 0 to 50%. (e-g) Impact of distal inputs on burst probability and feedforward synaptic weights for constant presynaptic event rate. Positive distal input (90–140 s) increases burst probability (e) and strengthens feedforward synapses (f). Negative distal input (190–240 s) decreases burst probability and weakens synapses. A dendritic input to the presynaptic neuron (290–340 s) increases its burst probability and mildly affects its event rate (g), but does not significantly change the weights (f). (e) Event rate (ER; blue), burst probability (BP; solid red curve) and estimated BP (dashed red curve) for the postsynaptic population. The black dotted line indicates the prestimulation ER and serves as a reference for the variations of the ER with plasticity. (f) Weight change relative to the initial average value of the weights. (g) Same as panel e, but for the presynaptic population. For the schematic on the right-hand side, black and grey axonal terminals onto the presynaptic (green) population represent Poisson input noise; such noise is absent for the postsynaptic (light blue) population for this simulation.

110 Methods). When a postsynaptic event that is not a burst occurs, the weight decreases proportionally to  
 111  $\bar{P}_i(t)\tilde{E}_j(t) < 0$ . In contrast, if a postsynaptic event is a burst then the weight increases proportionally  
 112 to  $[1 - \bar{P}_i(t)]\tilde{E}_j(t) > 0$ . Hence, this moving average regulates the relative strength of burst-triggered  
 113 potentiation and event-triggered depression and can also be implemented by changes in the thresholds  
 114 for controlling how NMDA-dependent calcium influx translates into either LTD or LTP [71]. It has been  
 115 well established that such mechanisms exist in real neurons [75, 76].

116 The plasticity rule stipulates that when a presynaptic input is paired with a postsynaptic burst LTP is  
 117 induced, and otherwise, LTD results (Fig. 2a) [8, 9, 48, 49, 70, 71]. Using this rule, we simulated a series of  
 118 synaptic plasticity experiments from the experimental and computational literature. First, we examined  
 119 a frequency-dependent STDP protocol [7]. We found that when the spike pairing frequency is low, LTD  
 120 is produced, and when the pairing frequency is high, LTP is produced (Fig. 2b). This matches previous  
 121 reports on frequency-dependent STDP and shows that a burst-dependent synaptic plasticity rule can  
 122 explain this data. Then, we explored the behavior of our rule when the pre and postsynaptic neuron fire  
 123 independently according to Poisson statistics [77] (Fig. 2c). Experimental results have established that  
 124 in such a situation the postsynaptic firing rate should determine the sign of plasticity [7]. As in similar  
 125 learning rules [77], we found that a burst-dependent plasticity rule produces exactly this behavior (Fig.

126 2c). Notably, contrary to the Bienenstock-Cooper Munro (BCM) model [78] where the switching point  
127 between LTD and LTP depends on a nonlinear moving average of the forward-feeding activity, in the  
128 present case, the adaptive threshold is a burst probability, which can be controlled independently of the  
129 forward-feeding activity. These results demonstrate that a burst-dependent plasticity rule is capable of  
130 uniting a series of known experimental and theoretical results.

131 The burst-dependent rule suggests that feedback-mediated steering of plasticity could be achieved if  
132 there were a mechanism for top-down control of the likelihood of a postsynaptic burst. To illustrate this,  
133 in Fig. 2d we simulated another protocol wherein events were generated with Poisson statistics, and each  
134 event could become a burst with probability  $P$  (x axis in Fig. 2d). Manipulating this burst probability  
135 against the initial burst probability estimate ( $\bar{P}_i(0) = 20\%$ ) controlled the occurrence of LTP and LTD,  
136 while changing the pre and postsynaptic event rates simply modified the rate of change of the weight  
137 (but not the transition point between LTP and LTD). This shows that one way for neurons to control the  
138 sign of plasticity to ensure effective learning may be to regulate the probability of high-frequency bursts.  
139 Interestingly, evidence suggests that in cortical pyramidal neurons of sensory cortices the probability of  
140 generating high-frequency bursts is controlled by inputs to the distal apical dendrites and their activation  
141 of voltage-gated calcium channels (VGCCs) [45, 73, 79–81]. Anatomical and functional data has shown  
142 that these inputs often come from higher-order cortical or thalamic regions [82, 83].

143 We wondered whether combining a burst-dependent plasticity rule with regenerative activity in apical  
144 dendrites could permit top-down signals to act as a “teaching signal”, instructing the sign of plasticity in  
145 a neuron. To explore this, we ran simulations of pyramidal neuron models with simplified VGCC kinetics  
146 in the apical dendrites (see Methods). We found that by manipulating the distal inputs to the apical  
147 dendrites we could control the number of events and bursts in the neurons independently (Figs. 2e, g).  
148 Importantly, the inputs to the apical dendrites in the postsynaptic neurons were what regulated the  
149 number of bursts, and this also controlled changes in the synaptic weights, through the burst-dependent  
150 learning rule. When the relative proportion of bursts increased, the synaptic weights potentiated on  
151 average, and when the relative proportion of bursts decreased, the synaptic weights depressed (Fig.  
152 2f). Thus, in Fig. 2f, the weight increases (decreases) on average when  $P - \bar{P}$  is positive (negative).  
153 Modifying the proportion of bursts in the presynaptic neurons had little effect on the weights (see the  
154 rightmost gray shaded area in Fig. 2e-g). The sign of plasticity was independent of the number of events,  
155 though the magnitude was not. Therefore, while the number of events contributed to the determination  
156 of the magnitude of changes, the top-down inputs to the apical dendrites controlled the sign of plasticity.  
157 In this way, the top-down inputs acted as a “teaching signal” that determined whether LTP or LTD  
158 would occur. These results show that a burst-dependent learning rule paired with the control of bursting  
159 provided by apical dendrites enables a form of top-down steering of synaptic plasticity in an online, local,  
160 and spike-based manner.

## 161 **Dendrite-dependent bursting combined with short-term plasticity supports** 162 **multiplexing of feedforward and feedback signals**

163 The question that naturally arises from our finding that top-down inputs can steer synaptic plasticity via  
164 a burst-dependent rule is whether feedback can steer plasticity without affecting the communication of  
165 bottom-up signals? Using numerical simulations, we previously have demonstrated that in an ensemble  
166 of pyramidal neurons the inputs to the perisomatic and distal apical dendritic regions can be distinctly  
167 encoded using the event rate computed across the ensemble of cells and the percentage of events  
168 in the ensemble that are bursts (the “burst probability”), respectively [59]. When communicated by  
169 synapses with either short-term facilitation (STF) or short-term depression (STD), this form of “ensemble  
170 multiplexing” may allow top-down and bottom-up signals to be simultaneously transmitted through a  
171 hierarchy of pyramidal neurons.

172 To explore this possibility, we conducted simulations of two reciprocally connected ensembles of  
173 pyramidal neurons along with interneurons providing feedforward inhibition. One ensemble received  
174 currents in the perisomatic region and projected to the perisomatic region of the other ensemble (Fig.  
175 3a, green ensemble). The other ensemble (Fig. 3a, light blue) received currents in the distal apical

176 compartment and projected to the distal apical compartment of the first ensemble. As such, we considered  
177 the first ensemble to be “lower” (receiving and communicating bottom-up signals), and the other to  
178 be “higher” (receiving and communicating top-down signals) in the hierarchy. Furthermore, we made  
179 one key assumption in these simulations. We assumed that the synapses in the perisomatic regions  
180 were short-term depressing, whereas those in the distal apical dendrites were short-term facilitating.  
181 Additionally, we assumed that the inhibitory interneurons targeting the perisomatic region possessed STD  
182 synapses, and the inhibitory interneurons targeting the distal apical dendrites possessed STF synapses.  
183 These properties are congruent with what is known about parvalbumin-positive and somatostatin-positive  
184 interneurons [46, 47, 84], which target the perisomatic and apical dendritic regions, respectively.

185 In these simulations, we observed that currents injected into the lower ensemble’s perisomatic  
186 compartments were reflected in the event rate of those neurons (Fig. 3c3), though with a slight phase  
187 lead due to spike frequency adaptation. In contrast, the currents injected into the distal apical dendrites  
188 of the higher ensemble were reflected in the burst probability of those neurons (Fig. 3b2). Importantly,  
189 though, we also observed that these signals were simultaneously propagated up and down. Specifically,  
190 the input to the lower ensemble’s perisomatic compartments was also encoded by the higher ensemble’s  
191 event rate (Fig. 3b3), whereas the burst rate of the higher ensemble was encoded by the lower ensemble’s  
192 burst probability (Fig. 3c2). In this way, the lower ensemble had access to a conjunction of the signal  
193 transmitted to the higher ensemble’s distal apical dendrites, as well as the higher ensemble’s event rate  
194 (see arrow highlighting amplitude modulation in Fig. 3c2). Thus, since the higher ensemble’s event rate  
195 is modulated by the lower ensemble’s event rate, the burst rate ultimately contains information about  
196 both the top-down and the bottom-up signals (Fig. 3d). Notably, this is important for credit assignment,  
197 as credit signals ideally are scaled by the degree to which a neuron is involved in processing a stimulus  
198 (this happens in backprop, for example).

199 These simulations demonstrate that if bottom-up connections to perisomatic regions and perisomatic  
200 inhibition rely on STD synapses, while top-down connections to apical dendrites and distal dendritic  
201 inhibition utilize STF synapses, then ensembles of pyramidal neurons are capable of simultaneously  
202 processing both a top-down signal and a bottom-up signal using a combination of event rates, burst rates,  
203 and burst probabilities. We conclude that with the appropriate organization of short-term synaptic  
204 plasticity mechanisms, a top-down signal to apical dendrites can 1) control the sign of plasticity locally  
205 (steering; Fig. 2a), 2) be communicated to lower ensembles without affecting the flow of bottom-up  
206 information (multiplexing; Fig. 3), and 3) be combined with bottom-up signals appropriately for credit  
207 assignment.

## 208 **Combining a burst-dependent plasticity rule with short-term plasticity and** 209 **apical dendrites can solve the credit assignment problem**

210 To test whether STP, dendrite-dependent bursting and a burst-dependent learning rule can act simul-  
211 taneously in a hierarchy to support learning, we built a simulation of ensembles of pyramidal neurons  
212 arranged in three layers, with two ensembles of cells at the input, one ensemble of cells at the output,  
213 and two ensembles of cells in the middle (the “hidden” layer; Fig. 4a). The distal dendrites of the top  
214 ensemble received “teaching” signals indicating desired or undesired outputs. No other teaching signal  
215 was provided to the network. As such, the hidden layer ensembles were informed of the suitability of  
216 their output only via the signals they received from the output ensemble’s bursts. Currents injected into  
217 the somatic compartments of the input layer populations controlled their activity levels in accordance  
218 with the learning task to be discussed below. Compared to Figs. 2-3, for this simulation we made a few  
219 modifications to synaptic transmission and pyramidal neuron dynamics to streamline the burst-event  
220 multiplexing and decoding (see Methods). The most important addition, however, was that we modified  
221 the learning rule in Eq. 1 by multiplying the right-hand side by an additional global term,  $M(t)$ , that  
222 gates plasticity. This term abstracts a number of possible sources of control of plasticity, like dendritic  
223 inhibition [62, 73, 85], or disinhibition through vasoactive intestinal peptide (VIP)-positive cells [86], burst  
224 sizes [71, 87] or transient neuromodulation [14, 88, 89]. Importantly,  $M(t)$  in our model gates plasticity  
225 without changing its sign, contrary to some models on the role of neuromodulation in plasticity [21]. Its

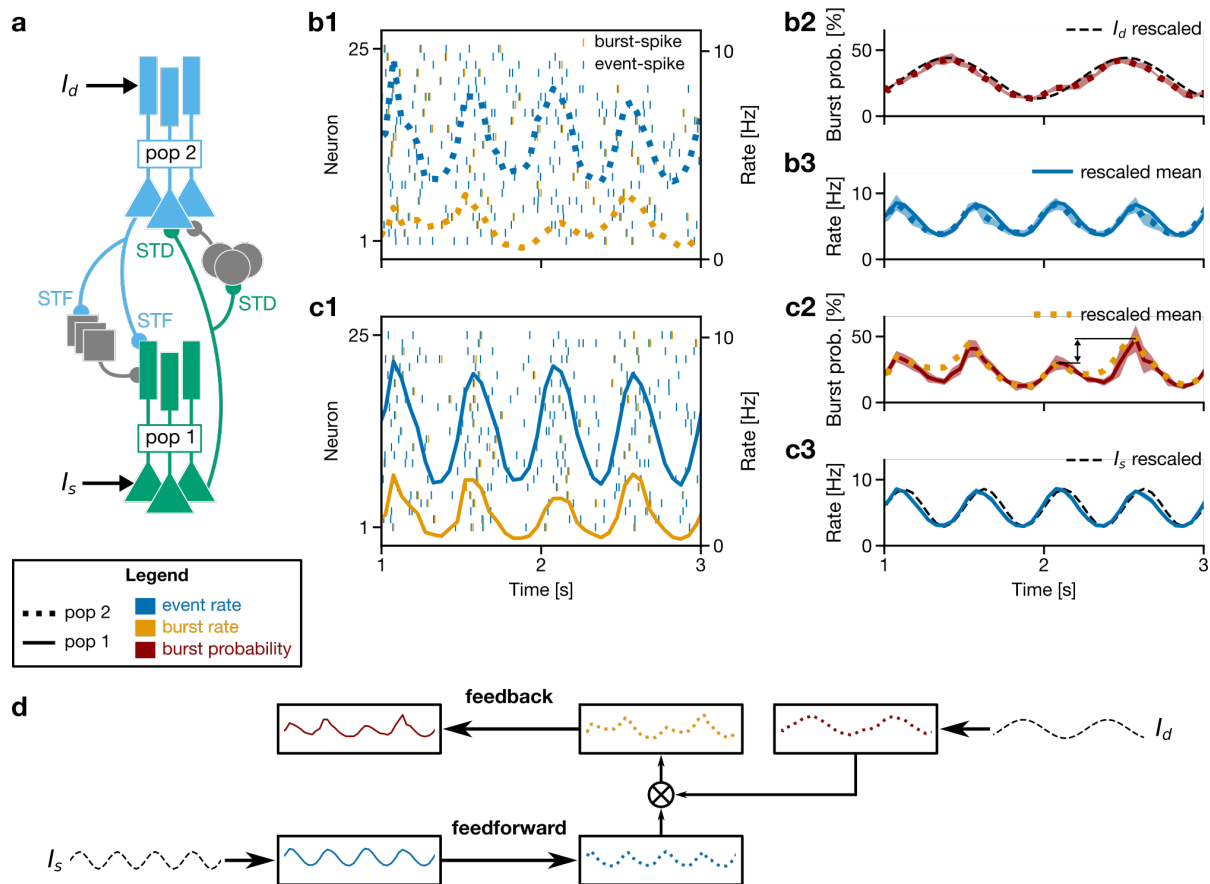

**Figure 3.** Dendrite-dependent bursting combined with short-term plasticity supports the simultaneous propagation of bottom-up and top-down signals. **(a)** Schematic of the network. Lower-level pyramidal neurons (green) received a somatic current  $I_s$  and projected with STD synapses to the somatic compartments of both a higher-level pyramidal neuron population (light blue) and to a population providing disynaptic inhibition (grey discs). The dendritic compartments of the light blue population received a current  $I_d$ . The light blue neurons innervated with STF synapses both the dendritic compartments of the green pyramidal neurons and a population providing disynaptic inhibition (grey squares). Results referring to the light blue and green population appear in panels **b1-b3** and **c1-c3**, respectively. **(b1, c1)** Raster plots of 25 out of the 4000 neurons per pyramidal population for the light blue (**b1**) and green (**c1**) populations. Blue ticks show the start of an event, being either a burst or an isolated spike. Orange ticks are the second spike in a burst; the remaining spikes in a burst are not shown. The corresponding population event rates (blue lines) and burst rates (orange lines) are superimposed. **(b2-b3)** Encoding performed by the light blue ensemble (pop 2). Its burst probability (**b2**, dotted red line) reflects the applied dendritic current  $I_d$  (dashed black line), whereas its event rate (**b3**, dotted blue line) reflects the event rate of the green population (solid blue line). **(c2-c3)** Encoding performed by the green ensemble (pop 1). Its burst probability (**c2**, solid red line) reflects the *burst rate* (dotted orange line) of the light blue ensemble, whereas its event rate (solid blue line) reflects the applied somatic current  $I_s$  (dashed black line). Arrow highlights amplitude modulation arising from the conjunction of top-down and bottom-up inputs. Results are displayed as mean  $\pm$  2SD over five realizations of the Poisson noise applied to all neurons in the network. In each panel, the encoded input signal has been linearly rescaled so that its range matches that of the output. For clarity, the encoded signals in panels **b3** and **c2** are displayed using their averages only (i.e., without the standard deviations). For instance, in panel **c2** the BP of the green population encodes the BR of the light blue population. The bin size used in the population averages was 50 ms. **(d)** Schematic illustrating information propagation in the network.

226 role was to make sure that plasticity elicited by the abrupt onset and offset of each training example  
227 does not overcome the plasticity elicited by the teaching signal, i.e. it was used to ensure a supervised  
228 training regime. We accomplished this by setting  $M = 0$  when no teaching signal was present at the  
229 output layer and  $M = 1$  under supervision. In this way, we ensured that the teaching signal was the  
230 primary driver of plasticity.

231 We trained our 3-layer network on the exclusive or (XOR) task, wherein the network must respond  
232 with a high output if only one input pool is active, and low output if neither or both input pools are  
233 active (Fig. 4a-b). We chose XOR as a canonical example of a task that requires a nonlinear hierarchy  
234 with appropriate credit assignment for successful learning. Before learning, the network was initialized  
235 such that the output pool treated any input combination as roughly equivalent (Fig. 4c, dashed line).  
236 To compute XOR, the output pool would have to learn to reduce its response to simultaneously active  
237 inputs and increase its response to a single active input.

238 We set up the network configuration to address a twofold question: (1) Would an error signal applied  
239 to the top-layer neurons' dendrites be propagated downward adequately? (2) Would the burst-dependent  
240 learning rule combine top-down signals with bottom-up information to make the hidden-layer neurons  
241 better feature detectors for solving XOR?

242 Importantly, if the answer to these two questions were 'yes', we would expect that the two hidden  
243 ensembles would learn different features if they receive different feedback from the output. To test this,  
244 we provided hidden pool 1 with positive feedback from the output, and hidden pool 2 with negative  
245 feedback (Fig. 4a, light blue symbols). With this configuration, adequate error propagation to the two  
246 hidden pools would make their responses diverge with learning, and the output pool would learn to take  
247 advantage of this change. Indeed, our results showed that the XOR task was solved in this manner after  
248 training (Fig. 4c, solid line).

249 To understand how this solution was aided by appropriate credit assignment, we examined the  
250 information about the top-down teaching signals in each layer. According to the learning rule, plasticity  
251 can be steered by controlling the instantaneous propensity to burst with respect to a moving average of  
252 the burst probability (see term  $B_i - \bar{P}_i E_i$  in Eq. 1 and Fig. 2e-f). In the output pool, the error signal  
253 applied to the apical dendrites induced a temporary decrease in the burst probability when the input  
254 pools were both active or both inactive, and a temporary increase when only one input pool was active  
255 (Fig. 4d). These changes in the output burst probability modified the output burst rate, which was  
256 propagated to the hidden pools. As mentioned above, the hidden pools received top-down signals with  
257 different signs (Fig. 4e1-2, orange lines), and indeed their respective burst probabilities were altered  
258 in opposite directions (Fig. 4e1-2, red lines). Due to these distinct top-down signals and the adaptive  
259 threshold  $\bar{P}_i$ , the hidden pools' response diverged during learning (Fig. 4f1-2). For instance, hidden  
260 pool 1 reduced its responses to both inputs being active, while hidden pool 2 increased its response.  
261 These changes were due to the top-down control of the plasticity of synapses between the input and  
262 hidden pools. We verified that solving this task depends on the plasticity of connections from input to  
263 hidden units, but only weakly on the size of the ensembles (Fig. S1). Also, we verified that the task  
264 was solved when the time constant  $\tau_{\text{avg}}$  was shorter (Fig. S2), and when the feedback pathways had  
265 the same sign of connection (Fig. S3). These results demonstrate that the propagation of errors using  
266 burst-multiplexing and the burst-dependent learning rule can combine to achieve hierarchical credit  
267 assignment in ensembles of pyramidal neurons.

## 268 **Burst-dependent plasticity promotes linearity and alignment of feedback**

269 Having demonstrated that a burst-dependent learning rule in pyramidal neurons enables online, local,  
270 spike-based solutions to the credit assignment problem, we were interested in understanding the potential  
271 relationship between this algorithm and the gradient-descent-based algorithms used for credit assignment  
272 in machine learning. To do this, we wanted to derive the average behavior of the burst-dependent  
273 learning rule at the coarse-grained, ensemble-level, and determine whether it provided an estimate of  
274 a loss-function gradient. More precisely, in the spirit of mean-field theory and linear-nonlinear rate  
275 models [90–92], we developed a model where each unit represents an ensemble of pyramidal neurons,



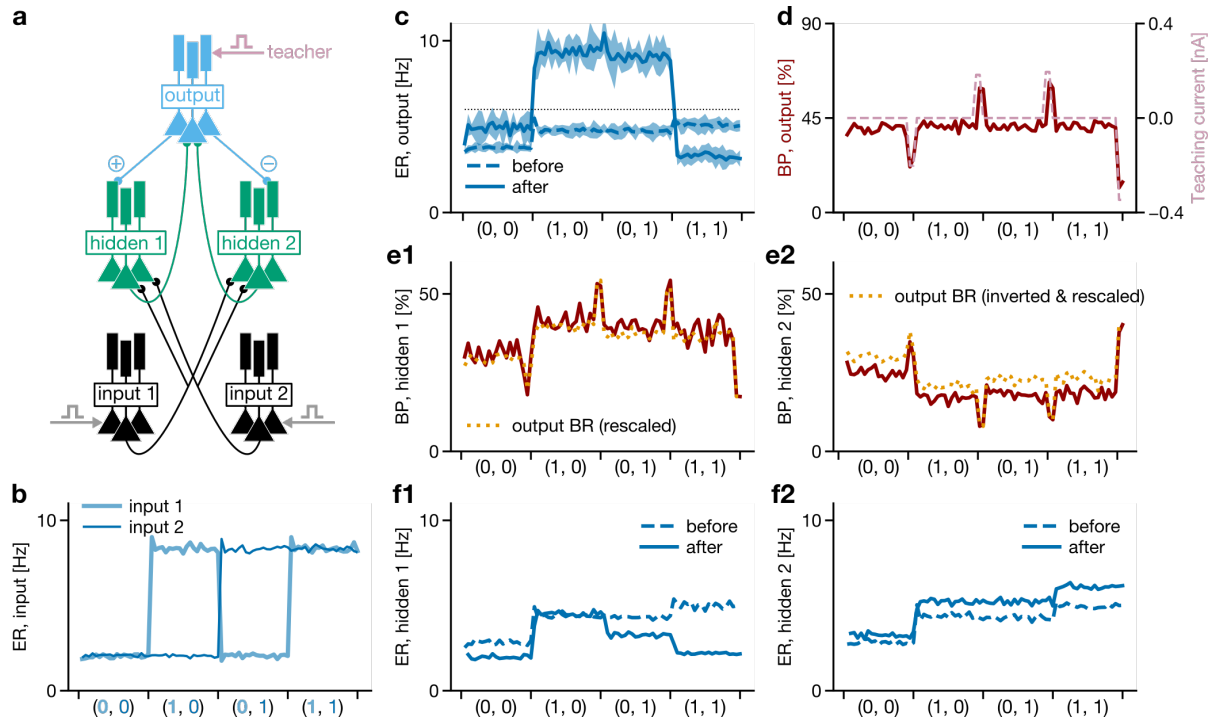

**Figure 4.** Burst-dependent plasticity can solve the credit assignment problem for the XOR task. (a) Each neuron population contained 2000 500 pyramidal neurons. Feedforward connections transmitted events, while feedback connections transmitted bursts. The teacher (pink arrow) was applied by injecting a hyperpolarizing current into the output ensemble’s dendrites if their event rate was high in the presence of inputs that are either both active or both inactive. A depolarizing current was injected into the output ensemble’s dendrites if their event rate was low when only one of the inputs was active. The activity of the input populations was controlled by somatic current injections (grey arrows). The  $\oplus$  and  $\ominus$  symbols represent the initialization of the feedback synaptic weights as mainly excitatory or inhibitory. (b) Input layer event rates (ERs) for the four input conditions presented sequentially in time. The duration of each example was 20 s 8 s. (c) Output ER before and after learning. The output ensemble acquired strong firing (event rate above the dotted line) at the input conditions associated with “true” in XOR. Results are displayed as mean  $\pm$  2SD over 5 random initializations of the single-neuron connectivity. In other panels, a single realization is displayed for clarity. Mean  $\pm$  2SD, in the same order as displayed: before:  $3.3 \pm 0.1$ ,  $4.7 \pm 0.1$ ,  $4.7 \pm 0.1$ ,  $4.9 \pm 0.1$ ; after:  $4.9 \pm 0.1$ ,  $7.1 \pm 0.2$ ,  $6.6 \pm 0.2$ ,  $5.0 \pm 0.1$  (in Hz). (d) During learning, the dendritic input (dashed pink) applied to the output ensemble’s neurons controlled their burst probability in the last two seconds of the input condition. (e1-e2) During learning, the burst rate (BR) at the output layer is encoded into the BP of the hidden layer to propagate the error. For the hidden-2 population, this inherited credit is inverted with respect to that in the hidden-1 population. (f1-f2) After (full line) vs. before (dashed line) learning for the hidden layer. The ER decreased in hidden-1 but increased in hidden-2. The bin size used in the population averages was 0.4 s.

with event rates, burst probabilities, and burst rates as described above (Fig. S4). In this step we lump together aspects of the microcircuitry, such as feedforward inhibition by parvalbumin-positive cells which helps to linearize the transfer function of event rates and preventing bursting in the absence of apical inputs [93,94]. Specifically, for an ensemble of pyramidal neurons, we defined  $e(t)$  and  $b(t)$  as ensemble averages of the event and burst trains, respectively. Correspondingly,  $p(t) = b(t)/e(t)$  refers to the ensemble-level burst probability. We then defined the connection weight between an ensemble of presynaptic neurons and an ensemble of postsynaptic neurons,  $W_{\text{post,pre}}$ , as the effective impact of the presynaptic ensemble on the postsynaptic ensemble, taking into consideration potential polysynaptic interactions. Note that this means that the ensemble-level weight,  $W_{\text{post,pre}}$ , can be either positive or negative, as it reflects the cumulative impact of both excitatory and inhibitory synapses (see Supplemental Materials).

Our goal was then to derive the ensemble-level weight updates from the burst-dependent plasticity rule (Eq. 1). We assumed that any given pair of neurons were only weakly correlated on average, a reasonable assumption if the synaptic weights in the circuit are small [95]. Moreover, decorrelation between neurons is observed when animals are attending to a task [95], which suggests that this is a reasonable assumption for active processing states. We further assumed that the neuron-specific moving average burst probability ( $\bar{P}_i$ ) is independent of the instantaneous occurrence of events. Using these assumptions, it can be shown (see Supplemental Materials) that the effective weight averaged across both pre and postsynaptic ensembles obeys:

$$\frac{dW_{\text{post,pre}}}{dt} = \eta M(t) [p_{\text{post}}(t) - \bar{p}_{\text{post}}(t)] e_{\text{post}}(t) e_{\text{pre}}(t) \quad (2)$$

where the learning rate  $\eta$  is different from that appearing in Eq. 1, and  $\bar{p}_{\text{post}}(t)$  is a ratio of moving averages for the postsynaptic burst rate and event rate. This learning rule can be shown to implement an approximation of gradient descent for hierarchical circuits, like the backpropagation-of-error algorithm [96]. Specifically, if we assume that the burst probabilities remain in a linear regime (linearity), that the feedback synapses are symmetric to the feedforward synapses (alignment), and that error signals are received in the dendrites of the top-level ensembles, then  $-[p_{\text{post}}(t) - \bar{p}_{\text{post}}(t)] e_{\text{post}}(t)$  is equivalent to the error signal sent backwards in backpropagation (see Supplemental Materials). For the sake of computational efficiency, when simulating this ensemble-level learning, we utilized simplifications to the temporal dynamics (i.e. we implemented a discrete-time version of the rule), though the fundamental computations being implemented were identical to the continuous-time equation above (see Methods and Supplemental Materials).

The assumptions of feedback linearity and alignment can be supported by the presence of additional learning mechanisms. First, we examined learning mechanisms to keep the burst probabilities in a linear regime. Multiple features of the microcircuit control linearity (Fig. S5), including distal apical inhibition [30,59], which is consistent with the action of somatostatin-positive Martinotti cells in cortical circuits [45,62]. We used recurrent excitatory and inhibitory inputs to control the apical compartments' potential (Fig. 5a). These dendrite-targeting inputs propagated bursts from neural ensembles at the same processing stage in the hierarchy, which provided them with the necessary information to keep the burst probabilities in a linear range of the burst probability function. We found that a simple homeostatic learning rule (see Methods) could learn to keep burst probabilities in a linear regime, thus improving gradient estimates (Fig. 5b).

Second, we explored potential mechanisms for learning weight symmetry. Symmetry between feedforward and feedback weights is an implicit assumption of many learning algorithms that approximate loss-function gradients. However, such an assumption is unnecessary, as it has been shown that it is possible to learn weight symmetry [61]. In one classic algorithm [97], weight symmetry is obtained if feedforward and feedback weights are updated with the same error signals, plus some weight decay [41]. In our model, this form of feedback weight update could be implemented locally because the error signal used to update the feedforward weights in discrete time is the deviation of the burst rates from the moving average baseline, and this, we propose, is also determining the updates to the feedback weights (see Methods). In brief, what this rule means in practice is that the apical dendrites would have a

317 different learning rule than the basal dendrites, something that has been observed experimentally [8,98].  
318 As well, the specific learning rule used here assumes that the sign of plasticity at the feedback synapses  
319 is based on presynaptic bursts, rather than postsynaptic bursts. Whether such a phenomenon exists  
320 in real apical dendrites has, to our knowledge, not yet been examined. However, we note that there  
321 are many different potential algorithms for training feedback weights, and we selected this one largely  
322 because it has been shown to perform well in artificial neural networks [41,99]. Thus, we anticipate that  
323 this feedback learning rule could be updated in the future based on experimental findings. Here, it is a  
324 tool we used to determine whether the burst-dependent plasticity rule can learn challenging tasks if it is  
325 paired with a feedback learning rule that promotes weight alignment. Indeed, when we implemented this  
326 form of learning on the ensemble-level feedback weights we observed rapid weight alignment (Fig. 5c and  
327 Fig. S6) and convergence to a loss-function gradient (Fig. 5d). Altogether, these results demonstrate  
328 that the burst-dependent learning rule, averaged across ensembles of pyramidal neurons, and paired with  
329 biologically plausible learning rules for recurrent inputs and feedback connections, can provide a good  
330 estimate of loss-function gradients in hierarchical networks.

### 331 **Ensemble-level burst-dependent plasticity in deep networks can support good** 332 **performance on standard machine learning benchmarks**

333 We wanted to determine whether the ensemble-level learning rule could perform well on difficult tasks  
334 from machine learning that previous biologically plausible learning algorithms have been unable to solve.  
335 Specifically, we built a deep neural network comprised of pyramidal ensemble units that formed a series  
336 of convolutional layers followed by fully-connected layers (Fig. 6a). We then trained these networks  
337 on two challenging image categorization datasets that previous biologically plausible algorithms have  
338 struggled with: CIFAR-10 and ImageNet [31].

339 The training in all components of the network used our burst-dependent plasticity rule and recurrent  
340 inputs for linearization at fully-connected hidden layers. For the CIFAR-10 dataset, we observed a  
341 classification test error rate of 20.1 % after 400 epochs (where an epoch is a pass through all training  
342 images), similar to the error rate achieved with full gradient descent in a standard artificial neural  
343 network (Fig. 6b). Training the feedback weights was critical for enabling this level of performance on  
344 CIFAR-10, as fixed feedback weights led to much worse performance, even when the number of units was  
345 increased in order to match the total number of trainable parameters (see Tables S3 and S4), in line with  
346 previous results [31]. Furthermore, rich unit-specific feedback signals were critical. A network trained  
347 using a global reward signal, plus activity correlations, while theoretically guaranteed to follow gradient  
348 descent on average [22,23], was unable to achieve good performance on CIFAR-10 in a reasonable amount  
349 of time (Fig. 6b, node perturbation). For the ImageNet dataset, we observed a classification error rate  
350 of 56.1 % on the top 5 predicted image classes with our algorithm, which is much better than the error  
351 rate achieved when keeping the feedback weights fixed, and much closer to that of full gradient descent  
352 (Fig. 6c). The remaining gap between the ensemble-level burst-dependent learning rule and backprop  
353 performance on ImageNet can likely be explained by the fact that we could not use recurrent input at  
354 convolutional layers due to memory limitations, which led to degraded linearity of feedback at early  
355 layers (Fig. S7). We also trained a network on the MNIST dataset, and achieved a similar performance  
356 of 1.1% error on the test set with all three algorithms (Fig. S8). Therefore, these results demonstrate  
357 that the ensemble-level burst-dependent learning rule, coupled with additional mechanisms to promote  
358 multiplexing, linearity and alignment, can solve difficult tasks that other biologically plausible learning  
359 algorithms have struggled with.

## 360 **Discussion**

361 In this paper, we asked the following question: could high-frequency bursts in pyramidal neurons provide  
362 an instructive signal for synaptic plasticity that can coordinate learning across hierarchical circuits (Fig.  
363 1)? We have shown that the well-known burst-dependence of plasticity rule combined with STP and

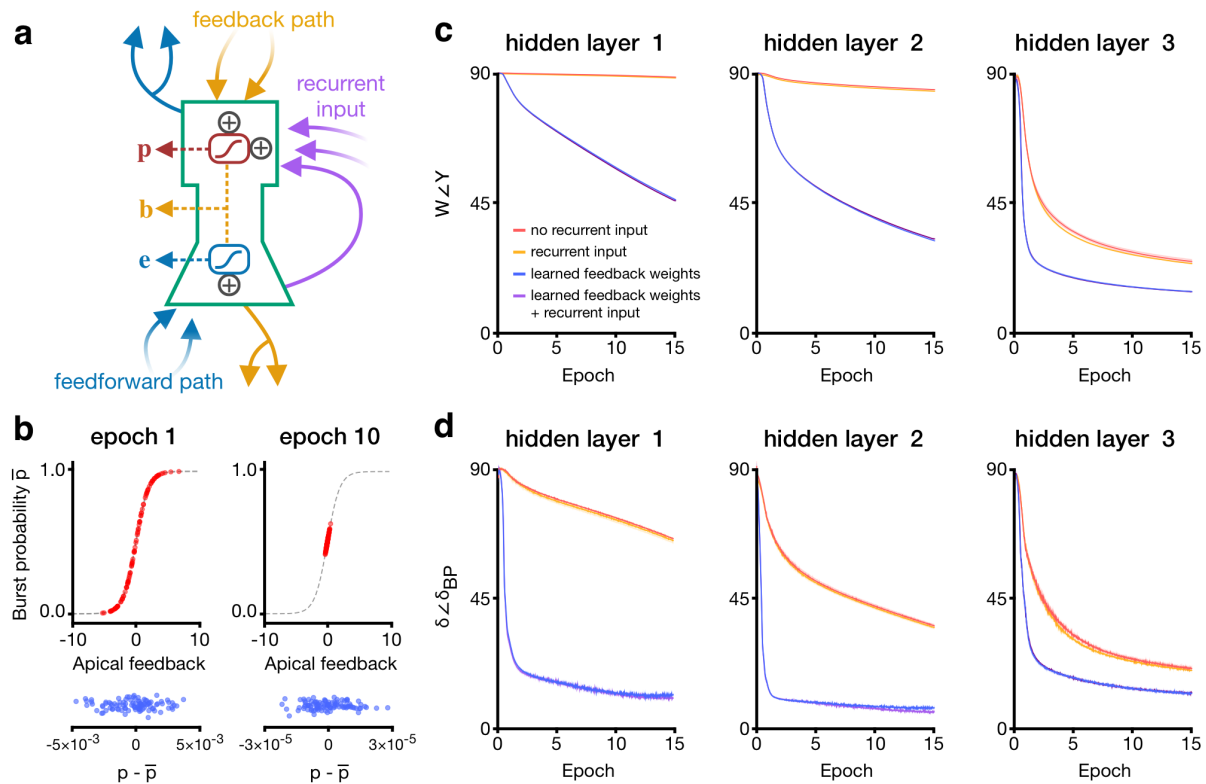

**Figure 5.** Burst-dependent plasticity of recurrent and feedback connections promotes gradient-based learning by linearizing and aligning feedback. **(a)** Diagram of a hidden-layer unit in the rate model. Each unit (green outline) in the network represents an ensemble of pyramidal neurons. Recurrent inputs (purple arrows) from all ensembles in a layer provide homeostatic control of the dendritic potential. **(b)** Throughout learning, recurrent weights were updated in order to push the burst probabilities towards the linear regime (top). This led to an overall decrease in the magnitudes of burst probabilities, while continuing to support positive and negative values necessary for credit assignment (bottom). **(c)** Alignment of feedback weights  $Y$  and feedforward weights  $W$  for three layers in a three-hidden-layer network trained on MNIST. Each hidden layer contained 500 units. Homeostatic recurrent inputs slightly reduce the angle between the two sets of weights, denoted  $W \angle Y$ , while learning on the feedback weights dramatically improves weight alignment. Each datapoint is the angle between feedforward and feedback weights at the start of a training epoch. **(d)** Angle between our weight updates ( $\delta$ ) and those prescribed by the backpropagation algorithm ( $\delta_{BP}$ ), for three layers in a three-hidden-layer network trained on MNIST. Recurrent inputs slightly improve the approximation to backpropagation, whereas learning on the feedback weights leads to a much closer correspondence. Each datapoint is the average angle between weight updates during a training epoch. In **c** and **d**, results are displayed as mean  $\pm$  SD over  $n = 5$  trials.

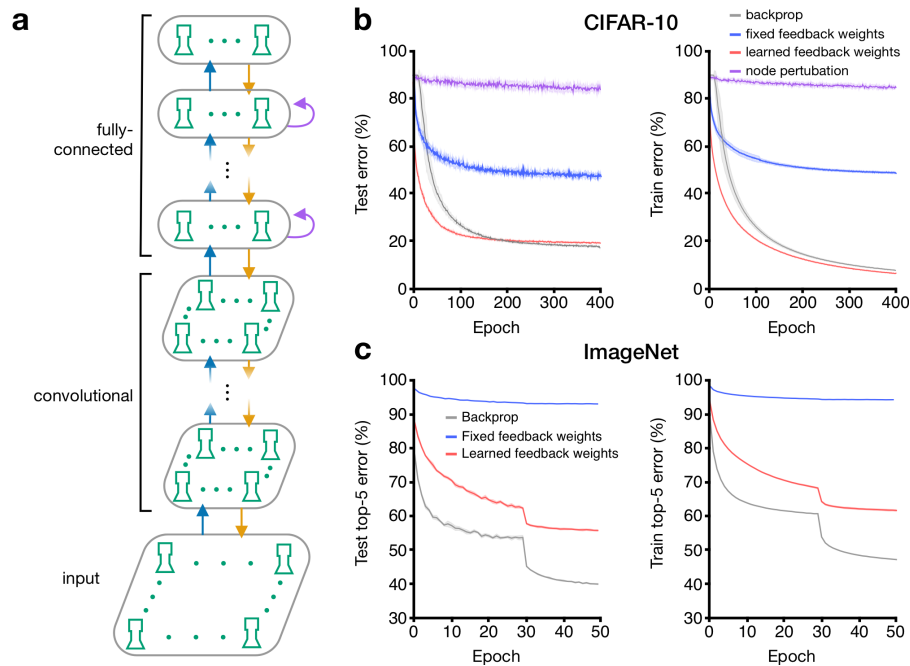

**Figure 6.** Ensemble-level burst-dependent plasticity supports learning in deep networks. (a) The deep networks consisted of an input layer, a series of convolutional layers, and a series of fully-connected layers. Layers were connected with sets of feedforward weights (blue arrows) and feedback weights (orange arrows). Fully-connected hidden layer contained recurrent connections (purple arrows). (b) Our learning rule, combined with learning of the feedback weights, was able to reach the performance of the backpropagation algorithm (backprop) on the CIFAR-10 classification task. (c) A network trained using our learning rule was able to learn to classify images in the ImageNet dataset when feedback weights were also updated. In b and c, results are displayed as mean  $\pm$  SD over  $n = 5$  trials.

364 regenerative dendritic activity turns feedback connections into a teacher (Fig. 2), which by multiplexing  
365 (Fig. 3) can coordinate plasticity across multiple synaptic jumps (Fig. 4). We then showed that, with  
366 some additional burst-dependent learning at recurrent and feedback synapses, these mechanisms provide  
367 an approximation of a loss-function gradient for supervised learning (Fig. 5) and perform well on  
368 challenging image classification tasks (Fig. 6). Together, these results show that a local, spike-based and  
369 experimentally supported learning rule that utilizes high-frequency bursts as an instructive signal can  
370 enable sophisticated credit assignment in hierarchical circuits.

371 Decades of research into biologically plausible learning have struggled to find a confluence of biological  
372 properties that permit efficient credit assignment. In this manuscript, we focused on the frequency-  
373 dependence of LTP/LTD, STP, dendritic nonlinearities, and inhibitory microcircuits. We focused on  
374 these aspects in part because the previous literature has established that these properties have important  
375 links with synaptic plasticity [6, 73, 85, 100], but also because they are very well-established properties of  
376 cortical circuits. Our burst-dependent learning rule itself could readily be implemented by previously  
377 established synaptic plasticity signalling pathways [76]. Overall, our model can be seen as a concrete  
378 implementation of a recent proposal from [25], which posited that differences in activity over time could  
379 carry gradient signals. Here, we have shown that differences in the probability of high-frequency bursts  
380 can carry gradient signals without affecting the time-dependent flow of sensory information. Therefore,  
381 one of the primary lessons from our model is that when local synaptic plasticity rules are sensitive  
382 to high-frequency bursts, then pyramidal neurons possess the necessary machinery for backprop-like  
383 top-down control of synaptic plasticity.

384 It is important to note that there are a number of limitations to our model. First, our ensemble-level  
385 models utilized many “ensemble units” that incorporated the activity of many pyramidal neurons, which  
386 could potentially require networks of disproportionate size. However, the functional impact of using  
387 many neurons in an ensemble is to provide a means for averaging the burst probabilities. Theoretically,  
388 this averaging could be done over time, rather than over neurons. If so, there is no reason that the  
389 algorithm could not work with single-neuron ensembles, though it would require a much longer time  
390 to achieve good estimates of the gradients. To some extent, this is simply the typical issue faced by  
391 any model of rate-based coding: if rates are used to communicate information then spatial or temporal  
392 averaging is required for high-fidelity communication. Furthermore, we suspect that allowing population  
393 coding could reduce the number of neurons required for a reliable representation [101].

394 Next, by focusing on learning, we ignored other ongoing cognitive processes. For instance, the  
395 close link between attention and credit assignment implies that the same mechanisms may serve both  
396 attention and learning purposes [65, 102]. Although some experimental data points to a role of bursting  
397 in attention [103, 104], further work is required to establish if burst coding can give rise to attention-like  
398 capabilities in neural networks.

399 The presence of the gating term,  $M(t)$ , may be seen as an additional limitation in the model, since  
400 it is left in an abstract form and not directly motivated by biology. This term was introduced in  
401 order to ensure that learning was driven by the teaching signal and not by changes in the stimuli.  
402 Of course, if the goal is not supervised learning, but unsupervised learning, then this term may be  
403 unnecessary. Indeed, one may view this as a prediction of sorts, i.e. that learning to match a target  
404 should involve additional gating mechanisms that are not required for unsupervised learning. These  
405 gating mechanisms could be implemented, e.g., by dendritic disinhibition [62, 73, 85, 86] (Fig. S5b)  
406 or transient neuromodulation [14, 88, 89]. Our model did not include any sophisticated disinhibition  
407 mechanisms or neuromodulatory systems. Yet, we know both disinhibition and neuromodulation can  
408 regulate synaptic plasticity [14]. Future work could investigate how burst-dependent plasticity and  
409 disinhibition/neuromodulation could interact to guide supervised learning.

410 Another set of limitations derive from how we moved from detailed cellular-level simulations to abstract  
411 neural network models that were capable of solving complex tasks. For example, in moving to the abstract  
412 models, we gradually made a number of simplifying assumptions, including clear separation between  
413 bursts and single spikes, simplified STP, simplified bursting mechanisms, and ensemble-level units that  
414 represented spiking activity across multiple neurons with a single value. We highlight these limitations  
415 because it is important to keep them in mind when considering the potential for the cellular-level

---

416 plasticity rule to implement sophisticated credit assignment. Ideally, we would have the computational  
417 resources to fully simulate many thousands of ensembles of pyramidal neurons and interneurons with  
418 complex synaptic dynamics and bursting in order to see if the cellular-level burst-dependent rule could  
419 also solve complicated tasks. However, these questions will have to be resolved by large-scale projects  
420 that can simulate millions of biophysically realistic neurons with complicated internal dynamics [105, 106].

421 Similarly, we did not include recurrent connections between pyramidal neurons within a layer, despite  
422 the fact that such connections are known to exist. We did this for the sake of simplicity, but again, we  
423 consider recurrent connectivity to be fully compatible with our model and a subject of future investigations.  
424 Moreover, our model makes some high-level assumptions about the structure of cortical circuitry. For  
425 example, we assumed that top-down signals are received at apical dendrites while bottom-up signals  
426 are received at basal dendrites. There is evidence for this structure [82], but also some data showing  
427 that it is not always this way [107]. Likewise, we assumed that pyramidal neurons across the cortical  
428 hierarchy project reciprocally with one another. There is some evidence that the same cells that project  
429 backwards in the cortical hierarchy also project forwards [108], but the complete circuitry of cortex is far  
430 from determined.

431 Our model makes a number of falsifiable experimental predictions that could be examined experimen-  
432 tally. First, the model predicts that there should be a polarization of STP along the sensory hierarchy,  
433 with bottom-up synaptic projections being largely STD and top-down synaptic projections being largely  
434 STF. There are reports of such differences in thalamocortical projections [66, 67], which suggests that an  
435 important missing component of our model is the inclusion of thalamic circuitry. There are also reports  
436 of polarization of STP along the basal dendrosomatic axis [109], and our model would predict that this  
437 polarization should extend to apical dendrites. Second, because our model proposes that burst firing  
438 carries information about errors, there should be a relationship between burst firing and progress in  
439 learning. Specifically, our model predicts that the *variance* in burst probabilities across a population  
440 should be correlated with the errors made during learning (Fig. S9). Experimental evidence in other  
441 systems supports this view [58, 73]. Finally, our model predicts that inhibition in the distal apical  
442 dendrites serves, in part, to homeostatically regulate burst probabilities to promote learning. Thus, a  
443 fairly simple prediction from the model is that manipulations of distal dendrite targeting interneurons,  
444 such as somatostatin positive interneurons, should lead to unusual levels of bursting in cortical circuits  
445 and disrupt learning. Some recent experimental evidence supports this prediction [73, 85].

446 Linking low-level and high-level computational models of learning is one of the major challenges in  
447 computational neuroscience. Our focus on supervised learning of static inputs was motivated by recent  
448 progress in this area. However, machine learning researchers have also been making rapid progress in  
449 unsupervised learning on temporal sequences in recent years [110, 111]. We suspect that many of the  
450 same mechanisms we explored here, e.g. burst-dependent plasticity, but also many of the mechanism not  
451 explored here, e.g. NMDA-spikes inducing cooperativity [112, 113], or bursting induced by feedforward  
452 activity escaping feedforward inhibition [93, 94], could be adapted for unsupervised learning of temporal  
453 sequences in hierarchical circuits. It is likely that the brain combines unsupervised and supervised  
454 learning mechanisms, and future research should be directed towards how neurons may combine different  
455 rules for these purposes. Ultimately, by showing that a top-down orchestration of learning is a natural  
456 result of a small set of experimentally observed physiological phenomena, our work opens the door to  
457 future approaches that utilize the unique physiology of cortical microcircuits to implement powerful  
458 learning algorithms on dynamic stimuli using time-varying signals.

## 459 Methods

### 460 Spiking model

461 Spiking simulations were performed using the Auryn simulator [114], except for the pairing protocols of  
462 Fig. 2b-d, which used Python.

### 463 Event and burst detection

An *event* was said to occur either at the time of an isolated spike or at the time of the first spike in a burst. A *burst* was defined as any occurrence of at least two spikes with an interspike interval (ISI) less than the threshold  $b_{\text{th}} = 16$  ms [59, 115]. Any additional spike with  $\text{ISI} < b_{\text{th}}$  belonged to the same burst. A neuron  $i$  kept track of its time-averaged burst probability  $\bar{P}_i$  by using exponential moving averages of its event train  $E_i$  and burst train  $B_i$ :

$$\bar{E}_i(t) = \frac{1}{\tau_{\text{avg}}} \int_0^\infty E_i(t - \tau) e^{-\tau/\tau_{\text{avg}}} d\tau \quad (3)$$

$$\bar{B}_i(t) = \frac{1}{\tau_{\text{avg}}} \int_0^\infty B_i(t - \tau) e^{-\tau/\tau_{\text{avg}}} d\tau \quad (4)$$

$$\bar{P}_i(t) = \frac{\bar{B}_i(t)}{\bar{E}_i(t)}, \quad (5)$$

464 where  $\tau_{\text{avg}}$  is a slow time constant ( $\sim 1$ -10 s). Also,  $E_i(t) = \sum_{\text{event}} \delta(t - t_{i,\text{event}})$  and  $B_i(t) = \sum_{\text{burst}} \delta(t -$   
465  $t_{i,\text{burst}})$ , where  $t_{i,\text{event}}$  and  $t_{i,\text{burst}}$  indicate the timing of an event and of the second spike in a burst,  
466 respectively.

### 467 Plasticity rule

Weights were updated upon the detection of a postsynaptic event or burst according to

$$\frac{dw_{ij}}{dt} = \eta M \left\{ [(1 + H_i)B_i + (-\bar{P}_i + H_i)E_i] \tilde{E}_j + G_i E_j \right\} \quad (6)$$

468 where  $\tilde{E}_j(t) = \int_0^\infty E_j(t - \tau) e^{-\tau/\tau_{\text{pre}}} d\tau$  is a presynaptic trace with time constant  $\tau_{\text{pre}}$ . Here,  $\tau_{\text{pre}}$  is typically  
469 much smaller than  $\tau_{\text{avg}}$ , with  $\tau_{\text{pre}} \sim 10$  ms, but it could possibly be made larger to accommodate plasticity  
470 rules with slower dynamics [100]. The prefactor  $M$  gates plasticity during training: in the XOR task  
471 (Fig. 4),  $M = 1$  when the teaching signal is present and 0 otherwise. In Fig. 2,  $M = 1$  throughout.

Homeostatic terms help to restrict the activity of neurons to an appropriate range. The homeostatic functions  $H_i$  and  $G_i$  were defined as

$$H_i(t) = - \left( 1 - \frac{e_{\text{max}}}{\bar{E}_i(t)} \right) \Theta(\bar{E}_i(t) - e_{\text{max}}) \quad (7)$$

$$G_i(t) = [e_{\text{min}} - \bar{E}_i(t)] \Theta(e_{\text{min}} - \bar{E}_i(t)), \quad (8)$$

472 where  $e_{\text{min}}$  (resp.  $e_{\text{max}}$ ) is a minimum (resp. maximum) event rate, and  $\Theta(\cdot)$  denotes the Heaviside step  
473 function. When the neuron-specific running average of the event rate,  $\bar{E}_i(t)$ , lies within these limits,  
474  $H_i = G_i = 0$ , and we recover the learning rule of Eq. 1. In most simulations, network parameters were  
475 chosen in such a way that the homeostatic plasticity had little to no effect. Typically, we used  $e_{\text{min}} = 2$   
476 Hz and  $e_{\text{max}} = 10$  Hz.

### 477 Pairing protocols

478 For all pairing protocols of Fig. 2b-d, we had  $\tau_{\text{pre}} = 50$  ms,  $\tau_{\text{avg}} = 15$  s,  $\eta = 0.1$ , and we set the  
479 homeostatic terms to zero.



- 480 • *Periodic protocol.* Five consecutive pairings were separated by a quiescent period of 10 s, 15 times.  
 481 We used pairings with  $\Delta t = 0$ . For each pairing frequency the starting value for the estimated  
 482 burst probability was  $\bar{P}_i(t = 0) = 0.15$  and  $\bar{E}_i(t = 0) = 5$  Hz.
- 483 • *Poisson protocol.* Both the pre and postsynaptic neurons fired spikes at a Poisson rate  $r$  with  
 484 no refractory period a refractory period of 2 ms. For each  $r$ , the induction lasted 100 s and we  
 485 averaged over 20 independent realizations. We used  $\bar{E}_i(t = 0) = 5$  Hz.
- 486 • *Burst-Poisson protocol.* Both the pre and postsynaptic neurons produced events at a Poisson rate  
 487  $r$ , including a refractory period  $\tau_{\text{ref}}^{(E)} > b_{\text{th}}$ . For each event, a burst was generated with probability  
 488  $p$  and an intraburst ISI was sampled from  $\text{Unif}(\tau_{\text{ref}}^{(B)}, \tau_{\text{ref}}^{(B)} + t_{\text{max}})$ , with  $\tau_{\text{ref}}^{(B)} + t_{\text{max}} < b_{\text{th}}$ . For  
 489 the simulations in Fig. 2d, we used  $\tau_{\text{ref}}^{(E)} = 20$  ms,  $\tau_{\text{ref}}^{(B)} = 2$  ms and  $t_{\text{max}} = 10$  ms. We set  
 490  $\bar{P}_i(t = 0) = 0.2$  and the event rate of the pre and postsynaptic neurons were set to  $r = 5$  Hz and  
 491  $r = 10$  Hz, with corresponding values for the initial postsynaptic event rate estimates. For each  $r$ ,  
 492 the induction lasted 100 s and we averaged over 20 independent realizations.

## 493 Neuron models

- *Pyramidal neurons* The somatic compartment obeyed

$$\begin{aligned} C_s \dot{V}_s &= -(C_s/\tau_s)(V_s - E_L) + g_s f(V_d) + I_s - w_s \\ \tau_{w_s} \dot{w}_s &= -w_s + b\tau_{w_s} S(t) \end{aligned} \quad (9)$$

494 where  $V_s$  is the somatic membrane potential,  $w_s$  is an adaptation variable,  $I_s$  is the total current  
 495 applied to the soma (includes noise and other synaptic inputs) and  $S(t)$  is the spike train of  
 496 the neuron. The function  $f(V_d)$  in the equation for  $V_s$  takes into account the coupling with the  
 497 dendritic compartment, with  $f(V_d) = 1/\{1 + \exp[-(V_d - E_d)/D_d]\}$  and parameters  $E_d = -38$  mV  
 498 and  $D_d = 6$  mV. A spike occurred whenever  $V_s$  crossed a moving threshold from below. The latter  
 499 jumped up by 2 mV right after a spike and relaxed towards -50 mV with a time constant of 27 ms.  
 500 Other somatic parameters were:  $\tau_s = 16$  ms,  $C_s = 370$  pF,  $E_L = -70$  mV,  $\tau_{w_s} = 100$  ms,  $b = 200$   
 501 pA, and  $g_s = 1300$  pA. The reset voltage after a spike was  $V_r = -70$  mV.

The dendritic compartment obeyed

$$\begin{aligned} C_d \dot{V}_d &= -(C_d/\tau_d)(V_d - E_L) + g_d f(V_d) + c_d(K * S)(t) + I_d - w_d \\ \tau_{w_d} \dot{w}_d &= -w_d + a_w(V_d - E_L). \end{aligned} \quad (10)$$

502 The function  $f(V_d)$  is the same as above and is responsible for the regenerative dendritic activity.  
 503 The term  $c_d(K * S)(t)$  represents the backpropagating action potential, with the kernel  $K$  modeled  
 504 as a box filter of amplitude one and duration 2 ms, delayed by 0.5 ms with respect to the somatic  
 505 spike. Other dendritic parameters were:  $\tau_d = 7$  ms,  $C_d = 170$  pF,  $E_L = -70$  mV,  $\tau_{w_d} = 30$  ms,  
 506  $a = 13$  nS, and  $g_d = 1200$  pA.

507 This model and its parameters are described in more detail and compared with experimental data  
 508 in Ref. [59].

- *Dendrite-targeting inhibition.* We modeled somatostatin-positive interneurons [116–118] using the  
 adaptive exponential integrate-and-fire (AdEx) model [119]:

$$\begin{aligned} C \dot{V} &= -g_L(V - E_L) + g_L \Delta_T e^{\frac{V - V_T}{\Delta_T}} + I - w \\ \tau_w \dot{w} &= a(V - E_L) + b\tau_w S(t) - w \end{aligned}$$

509 where  $I$  is the total current applied to the neuron. A spike occurred whenever  $V$  crossed  $V_{\text{cut}} = 24$   
 510 mV and was followed by a refractory period  $\tau_{\text{ref}}$ . Parameter values were  $C = 100$  pF,  $g_L = 5$  nS,  
 511  $E_L = -70$  mV,  $V_T = -62$  mV,  $\Delta_T = 4$  mV,  $\tau_w = 500$  ms,  $a = 0.5$  nS,  $b = 10$  pA,  $V_r = -65$  mV  
 512 and  $\tau_{\text{ref}} = 2$  ms. In Fig. 3, these model neurons (grey squares in Fig. 3a) were receiving top-down  
 513 excitation from higher-level pyramidal cells.

514 • *Perisomatic inhibition* We modeled parvalbumin-positive neurons [120] using the AdEx model  
515 with parameters chosen to reproduce qualitatively their typical fast-spiking phenotype. Parameter  
516 values were  $C = 100$  pF,  $g_L = 10$  nS,  $E_L = -70$  mV,  $V_T = -48$  mV,  $\Delta_T = 2$  mV,  $V_r = -55$  mV,  
517  $\tau_{\text{ref}} = 1$  ms and  $a = b = 0$ . In Fig. 3, these model neurons (grey discs in Fig. 3a) were receiving  
518 bottom-up excitation from the lower-level pyramidal cells.

## 519 Connectivity

520 In general, connections between distinct neural ensembles were sparse ( $\sim 5 - 20\%$  connection probability).  
521 Pyramidal neurons within an ensemble had no recurrent connections between their somatic compartments.  
522 Within a pyramidal ensemble, burst-probability linearization was enacted by sparse STF inhibitory  
523 synapses onto the dendritic compartments (Fig. S10). These STF connections were not illustrated in Fig.  
524 3a for clarity. The net strength of inputs onto the apical dendrites was chosen to preserve a stationary  
525 burst probability between 10 and 50 %, as in vivo experimental data reports burst probability between  
526 15 and 25 % [74,104].

## 527 Synapses

528 All synapses were conductance-based. The excitatory (resp. inhibitory) reversal potential was 0 mV  
529 (resp.  $-80$  mV) and the exponential decay time constant was 5 ms (resp. 10 ms). There were no NMDA  
530 components to excitatory synapses. For a given connection between two ensembles, existing synapses  
531 had their strengths all initialized to the same value.

## 532 Noise

533 Each neuron (for single-compartment neurons) and each compartment (for two-compartment neurons)  
534 received its own (private) noise in the form of a high-frequency excitatory Poisson input combined to an  
535 inhibitory Poisson input. The only exception was the noise applied to the neural populations in Fig.  
536 2e-g, where we used sparse connections from a pool of excitatory and inhibitory Poisson neurons. Noise  
537 served to decorrelate neurons within a population and to imitate *in vivo* conditions.

## 538 Short-term plasticity

539 STP was modeled following the extended Markram-Tsodyks model [47]. Using the notation of Ref. [121],  
540 the parameters for STF were  $D = 100$  ms,  $F = 100$  ms,  $U = 0.02$  and  $f = 0.1$ . For STD, the parameters  
541 were  $D = 20$  ms,  $F = 1$  s,  $U = 0.9$  and  $f = 0.1$ . These sets of parameters were chosen following [59] to  
542 help decode bursts (using STF) and events (using STD).

## 543 Spiking XOR gate

544 A XOR gate maps binary inputs (0, 0) and (1, 1) onto 0 and inputs (1, 0) and (0, 1) onto 1. In the context  
545 of our spiking network, input 0 corresponded to a low event rate ( $\sim 2$  Hz) and input 1 to a higher event  
546 rate ( $\sim 10$  Hz). These were obtained by applying a hyperpolarizing (resp. depolarizing) current for 0  
547 (resp. 1) to the corresponding input-layer population. Importantly, compared to the spiking simulations  
548 described above, our implementation of the spiking XOR gate used three simplifications to reduce the  
549 dimension of the parameter search space. First, events and bursts were propagated directly instead of  
550 relying on STP (see Fig. S11). Second, disynaptic inhibition was replaced by direct inhibition coming  
551 from the pyramidal cells. Third, we used a simplified pyramidal neuron model. Below, we describe this  
552 model, as well as the initialization of the network, the error generation and the learning protocol for the  
553 XOR gate.

554 • *Simplified pyramidal neuron model.* The effect of dendritic regenerative activity on the somatic  
555 compartment (controlled by  $g_s$  in Eqs. 9-10) was replaced by a conditional burst probability:  
556 whenever a somatic event occurred, a burst was produced with probability  $f(V_d)$ . This function is

557 the same as that appearing in Eqs. 9-10, but with  $E_d = -57$  mV. This model permitted a cleaner  
558 burst-detection process and burst-ensemble multiplexing.

559 • *Initialization of the network.* The feedforward synaptic strengths were initialized so that the event  
560 rates of all pyramidal ensembles in the network belonged to  $[e_{\min}, e_{\max}]$  for all inputs. Excitatory  
561 synaptic strengths from the input layer to the hidden layer were all equal, and likewise for the  
562 inhibitory synapses. For the hidden-to-output feedforward connections, the ratio of the excitatory  
563 synaptic strengths was 1.4:1.05 in favor of hidden 1. This ratio for inhibition was 5:0.3 in favor  
564 of hidden 2. All existing feedforward excitatory synaptic strengths were equal together, and  
565 likewise for the inhibitory synapses. The feedback synaptic strengths from the output population  
566 to the hidden populations—the only existing ones—were initialized so that one coarse-grained  
567 connection would be predominantly excitatory and the other inhibitory (the one onto hidden pool 2  
568 in Fig. 4). As with the feedforward connections, the excitatory feedback synapses belonging to the  
569 same coarse-grained connection shared the same strength, and likewise for inhibition. A constant  
570 depolarizing current was applied to the hidden pool 2's dendritic compartments to compensate for  
571 the stronger inhibition.

- *Error generation.* At the output layer, we specified a maximum and a minimum event rate,  $e_{\max}$   
and  $e_{\min}$  (the same as in the learning rule of Eq. 6). The following linearly transformed  $\bar{E}_i$

$$\bar{E}'_i = \frac{\bar{E}_i - e_{\min}}{e_{\max} - e_{\min}}$$

was then used in conjunction with a cross entropy loss function to compute the error for each  
neuron of the output population. As a result, a current,  $I_i^{(d)}$  (where  $d$  indicates “dendritic”), was  
injected into every neuron so that its burst probability would increase or decrease according to the  
running average of its event rate and the desired output:

$$\begin{aligned} \text{if desired output} = 0 &\Rightarrow I_i^{(d)} = -c/(e_{\max} - \bar{E}_i) \\ \text{if desired output} = 1 &\Rightarrow I_i^{(d)} = c/(\bar{E}_i - e_{\min}). \end{aligned}$$

572 where  $c \sim 1$  nA · Hz. For instance, if the desired output was 0 and  $\bar{E}_i$  was large, then the injected  
573 current was strongly hyperpolarizing. The injected current was set to zero when  $\bar{E}_i$  was to within  
574 1 Hz of the desired value.

575 • *Learning protocol.* A simulation proceeded as follows. With the plasticity off, there was first a  
576 relaxation interval of duration  $3\tau_{\text{avg}}$ , with no input applied to the network. In Fig. 4, we have set  
577  $\tau_{\text{avg}} = 2$  s, although a faster time scale can still yield adequate learning (Fig. S2). Then, the four  
578 different input pairs were applied consecutively to give the “before learning” response in Fig. 4d.  
579 Afterward, the four input/output pairs were applied consecutively for 20 s each (typically in the  
580 same order); namely one epoch (for one epoch), typically in the same order (but see Fig. S1e).  
581 For each input/output pair, first, the input alone was applied to the input populations with the  
582 plasticity off. We let the network reach its steady state for that input for the first 90% of the  
583 duration of an example. During this prediction interval, the moving average of the burst probability  
584 would converge towards the actual burst probability of the population for that given input. The  
585 duration of an example was chosen to be  $4\tau_{\text{avg}} = 8$  s to provide enough time for this steady state to  
586 be reached to a good approximation, although relaxing that assumption can still produce adequate  
587 learning (Fig. S2). During the last 10% of the example duration, the plasticity was activated for  
588 all feedforward excitatory synapses and the teacher was applied. For computational efficiency,  
589 the error was computed once, at the very end of the prediction interval. The total number of  
590 epochs required to reach decent performance depended on the initialization of the network and the  
591 learning rate; for Fig. 4, we used 500 epochs. At the end of learning, the plasticity was switched  
592 off for good and the “after learning” response was computed.

## 593 Deep network model for categorical learning

594 We now describe the deep network model that was used to learn the classification tasks reported in  
 595 Figs. 5-6. The model can be seen as a limiting case of a time-dependent rate model, which itself can be  
 596 heuristically derived from the spiking network model under simplifying assumptions (see Supplemental  
 597 Materials).

598 For the fully-connected layers in the network, we defined the “somatic potentials” of units in layer  $l$   
 599 as:

$$\mathbf{v}_l = \mathbf{W}_l \mathbf{e}_{l-1},$$

where  $\mathbf{W}_l$  is the weight connecting layer  $l-1$  to layer  $l$ . Note that in this formulation we include a bias term as a column of  $\mathbf{W}_l$ . The event rate of layer  $l$  was given by

$$\mathbf{e}_l = f_l(\mathbf{v}_l),$$

600 where  $f_l$  is the activation function for layer  $l$ . In models trained on MNIST and CIFAR-10, the activation  
 601 function was a sigmoid. In the model trained on ImageNet, a ReLU activation was used for hidden layers  
 602 and a softmax activation was used at the output layer.

During the feedforward pass, the burst probability at the output layer ( $l = L$ ) was set to a constant,  $p_L^{(0)}$  (in these experiments, this was set to 0.2). Our previous research [59] has shown that the dendritic transfer function is a sigmoidal function of its input (see also Fig. S5). Therefore, the hidden-layer burst probabilities,  $\mathbf{p}_l$ , for  $l < L$ , were computed using a sigmoidal function of a local “dendritic potential”  $\mathbf{u}_l$  as

$$\mathbf{p}_l = \sigma(\beta \mathbf{u}_l + \alpha),$$

where  $\alpha$  and  $\beta$  are constants controlling the dendritic transfer function. In our experiments, we set  $\beta = 1$  and  $\alpha = 0$ . Figure S5 illustrates various mechanisms affecting these parameters. The dendritic potentials were given by

$$\mathbf{u}_l = h(\mathbf{e}_l) \odot (\mathbf{Y}_l \mathbf{b}_{l+1}), \quad (11)$$

where  $\odot$  is the elementwise product. The vector-valued function  $h(\mathbf{e}_l) \equiv f'(\mathbf{v}_l) \odot \mathbf{e}_l^{-1}$  depends on the chosen activation function; of course, some caution is required when ReLU and softmax activations are used (see Supplemental Materials). The burst rate is given by

$$\mathbf{b}_{l+1} = \mathbf{p}_{l+1} \odot \mathbf{e}_{l+1}. \quad (12)$$

603 Finally,  $\mathbf{Y}_l$  is the feedback weight matrix. For the feedback alignment algorithm,  $\mathbf{Y}_l$  is a random matrix  
 604 and is fixed throughout learning [34]. In the standard backpropagation algorithm, the feedforward and  
 605 feedback weight matrices are symmetric so that  $\mathbf{Y}_l = \mathbf{W}_{l+1}^T$ , where  $T$  denotes the transpose. Below, we  
 606 also describe how to learn the feedback weights to make them symmetric with the feedforward weights  
 607 using the Kolen-Pollack algorithm [41].

With the teacher present, the output-layer burst probabilities were set to a squashed version of  $p_L^{(0)} - h(\mathbf{e}_l) \odot \nabla_{\mathbf{e}_L} \mathcal{L}$ , where  $\mathcal{L}$  is the loss function (a mean squared error loss for Figs. 5-6). The squashing function was to make sure that  $p_{L,i} \in [0, 1]$ . The Supplemental Materials provide a few examples of squashing functions. The burst probabilities of the hidden layers were then computed as above. Finally, the weights were updated according to

$$\Delta \mathbf{W}_l = \eta_l ((\mathbf{p}_l - \bar{\mathbf{p}}_l) \odot \mathbf{e}_l) \mathbf{e}_{l-1}^T - \lambda \mathbf{W}_l, \quad (13)$$

where  $\mathbf{p}_l$  and  $\bar{\mathbf{p}}_l$  denote the burst probabilities with and without teacher, respectively,  $\eta_l$  is the learning rate hyperparameter for units in layer  $l$ , and  $\lambda$  is a weight decay hyperparameter. Note that, for this model,  $\bar{\mathbf{e}}_l$  lags  $\mathbf{e}_l$  by a single computational step (see Supplemental Materials). Therefore, when the teacher appears,  $\bar{\mathbf{e}}_l = \mathbf{e}_l$  and we can write

$$(\mathbf{p}_l - \bar{\mathbf{p}}_l) \odot \mathbf{e}_l = \mathbf{b}_l - \bar{\mathbf{b}}_l.$$

608 This means that, in this model, the error is directly represented by the deviation of the burst rate with  
 609 respect to a reference.

In the case of convolutional layers, the event rates of ensembles in layer  $l$  were given by

$$\mathbf{e}_l = f_l(\mathbf{W}_l * \mathbf{e}_{l-1}),$$

where  $*$  represents convolution. Similarly, the dendritic potentials in layer  $l$  were given by  $\mathbf{u}_l = \mathbf{Y}_l * \mathbf{b}_{l+1}$  while burst probabilities were calculated as in the fully-connected layers. Finally, the weights of convolutional layers were updated as

$$\Delta \mathbf{W}_l = \eta_l \psi(\mathbf{b}_l - \bar{\mathbf{b}}_l, \mathbf{e}_{l-1}) - \lambda \mathbf{W}_l, \quad (14)$$

610 where  $\psi$  combines the burst deviations and event rates to compute an approximation of the gradient  
 611 with respect to the convolutional weights  $\mathbf{W}_l$ .

### 612 Learning the recurrent weights

In certain experiments, we introduced recurrent inputs into the hidden layers that served to keep burst probabilities in the linear regime of the sigmoid function. At layer  $l$ , we set the reference dendritic potentials to

$$\bar{\mathbf{u}}_l = h(\mathbf{e}_l) \odot \mathbf{Y}_l \bar{\mathbf{b}}_{l+1} - \mathbf{Z}_l \bar{\mathbf{b}}_l, \quad (15)$$

where  $\mathbf{Z}_l$  is the recurrent weight matrix and the burst rates used here, in bold sans-serif, are calculated as the burst rate *without* any recurrent inputs and *without* the teaching signal:

$$\bar{\mathbf{b}}_l = \sigma(\beta h(\mathbf{e}_l) \odot \mathbf{Y}_l \bar{\mathbf{b}}_{l+1} + \alpha) \odot \mathbf{e}_l. \quad (16)$$

Otherwise, the dendritic potentials and burst rates must be solved self-consistently, slowing down computations. Recurrent weights are then updated in order to minimize  $\bar{\mathbf{u}}_l$ :

$$\Delta \mathbf{Z}_l = -\eta_r \bar{\mathbf{u}}_l \bar{\mathbf{b}}_l^T, \quad (17)$$

where  $\eta_r$  is the learning rate. Note that, with these recurrent inputs, the updates of matrix  $\mathbf{W}_l$  are the same as before, but now with

$$\mathbf{p}_l = \sigma[\beta(h(\mathbf{e}_l) \odot \mathbf{Y}_l \mathbf{b}_{l+1} - \mathbf{Z}_l \bar{\mathbf{b}}_l) + \alpha].$$

613 .

### 614 Learning the feedback weights

Kolen and Pollack [97] found that if the feedforward and feedback weights are updated such that

$$\begin{aligned} \Delta \mathbf{W}_l &= \eta \mathbf{A} - \lambda \mathbf{W}_l \\ \Delta \mathbf{Y}_l &= \eta \mathbf{A} - \lambda \mathbf{Y}_l, \end{aligned}$$

where  $\mathbf{A}$  is any matrix with the same shape as  $\mathbf{W}_l$  and  $\mathbf{Y}_l$ , then  $\mathbf{Y}_l$  and  $\mathbf{W}_l$  will converge. This means that if the feedback weights are updated in the same direction as the feedforward weights and weight decay is applied to both sets of weights, they will eventually become symmetric. Thus, we implemented the following learning rule for the feedback weights between layer  $l+1$  and layer  $l$ :

$$\Delta \mathbf{Y}_l = \eta_l (\mathbf{b}_{l+1} - \bar{\mathbf{b}}_{l+1}) \mathbf{e}_l^T - \lambda \mathbf{Y}_l, \quad (18)$$

where  $\lambda$  is a weight decay hyperparameter. In convolutional layers, we used the following weight update:

$$\Delta \mathbf{Y}_l = \eta_l \psi(\mathbf{b}_{l+1} - \bar{\mathbf{b}}_{l+1}, \mathbf{e}_l) - \lambda \mathbf{Y}_l. \quad (19)$$

---

## 615 Training the model with CIFAR-10 and ImageNet

616 The network architectures described in Tables S3 and S4 of the Supplemental Materials were trained  
617 on standard image classification datasets, CIFAR-10 [122] and ImageNet [123]. The CIFAR-10 dataset  
618 consists of 60,000  $32 \times 32$  px training images belonging to 10 classes, while the ImageNet dataset consists  
619 of 1.2 million images (resized to  $224 \times 224$  px) split among 1000 classes.

620 Each unit in these networks represents an ensemble of pyramidal neurons and has an event rate, burst  
621 probability, and burst rate. For each training example, the input image is presented and a forward pass  
622 is done, where event rates  $\mathbf{e}_l$  throughout the network are computed sequentially, followed by a feedback  
623 pass where burst probabilities  $\bar{\mathbf{p}}_l$  and burst rates  $\bar{\mathbf{b}}_l$  are computed. Then, the teaching signal is shown at  
624 the output layer, and new burst probabilities  $\mathbf{p}_l$  and burst rates  $\mathbf{b}_l$  are computed backward through  
625 the network. Weights are then updated using our weight update rules. Networks were trained using  
626 stochastic gradient descent (SGD) with mini-batches, momentum and weight decay. ReLU layers were  
627 initialized from a normal distribution using Kaiming initialization [124], whereas Xavier initialization  
628 was used in sigmoid layers [125]. Hyperparameter optimization was done on all networks using validation  
629 data (see Supplemental Materials for details).

## 630 Training the model using node perturbation

Node perturbation is a technique that approximates gradient descent by randomly perturbing the  
activations of units in the network, and updating weights according to the change in the loss function  
[22, 23]. In the model trained using node perturbation, at each step, first the input is propagated through  
the network as usual, after which the global loss,  $L$ , is recorded. Then, the same input is propagated  
again through the network but the activations of units in a single layer  $l$  are randomly perturbed:

$$\mathbf{e}_l = f_l(\mathbf{W}_l * \mathbf{e}_{l-1} + \boldsymbol{\xi}_l), \quad (20)$$

where the elements of  $\boldsymbol{\xi}_l$  are chosen from a normal distribution with mean 0 and standard deviation  
 $\sigma$ . The new loss,  $L_{\text{NP}}$ , is recorded. The weights in layer  $l$  are then updated using the following weight  
update rule:

$$\Delta \mathbf{W}_l = \eta_l ((L_{\text{NP}} - L) \boldsymbol{\xi}_l / \sigma^2) \mathbf{e}_{l-1}^T. \quad (21)$$

631 The layer to be perturbed,  $l$ , is changed with each mini-batch by iterating bottom-up through all of the  
632 layers in the network.

## 633 Acknowledgments

634 We thank Adam Santoro and Leonard Maler for comments on this manuscript. We also thank Markus  
635 Hilscher and Maximiliano José Nigro for sharing data about SOM neurons. This work was supported  
636 by two NSERC Discovery Grants, 06872 (RN) and 04947 (BAR), a CIHR Project Grant (RN383647  
637 - 418955), a Fellowship from the CIFAR Learning in Machines and Brains Program (BAR) and the  
638 Novartis Research Foundation (FZ).

## 639 Author contributions

640 All authors contributed to the burst-dependent learning rule. AP performed the spiking simulations.  
641 JG designed the recurrent plasticity rule and performed the numerical experiments on CIFAR-10 and  
642 ImageNet. BAR and RN wrote the manuscript, with contributions from JG and AP. BAR and RN  
643 co-supervised the project.

---

## Code availability

The codes used in this article are available at <https://github.com/apayeur/spikingburstprop> and <https://github.com/jordan-g/Burstprop>.

## References

- [1] D. O. Hebb. *The Organization of Behavior*. Wiley, New York, 1949.
- [2] Pieter R Roelfsema and Anthony Holtmaat. Control of synaptic plasticity in deep cortical networks. *Nat Rev Neurosci*, 19(3):166, 2018.
- [3] A. Artola, S. Bröcher, and W. Singer. Different voltage dependent thresholds for inducing long-term depression and long-term potentiation in slices of rat visual cortex. *Nature*, 347:69–72, 1990.
- [4] Henry Markram, Joachim Lübke, Michael Frotscher, and Bert Sakmann. Regulation of synaptic efficacy by coincidence of postsynaptic APs and EPSPs. *Science*, 275:213–215, 1997.
- [5] D.E. Feldman. Timing-based ltp and ltd and vertical inputs to layer ii/iii pyramidal cells in rat barrel cortex. *Neuron*, 27:45–56, 2000.
- [6] Ole Paulsen and Terrence J Sejnowski. Natural patterns of activity and long-term synaptic plasticity. *Curr Opin Neurobiol*, 10(2):172–180, 2000.
- [7] Per Jesper Sjöström, Gina G Turrigiano, and Sacha B Nelson. Rate, timing, and cooperativity jointly determine cortical synaptic plasticity. *Neuron*, 32(6):1149–1164, 2001.
- [8] Johannes J. Letzkus, Bjorn M. Kampa, and Greg J. Stuart. Learning rules for spike timing-dependent plasticity depend on dendritic synapse location. *J. Neurosci.*, 26(41):10420–10429, October 2006.
- [9] B Kampa, J Letzkus, and G Stuart. Requirement of dendritic calcium spikes for induction of spike-timing-dependent synaptic plasticity. *J Physiol*, Jan 2006.
- [10] Per Jesper Sjöström and Michael Häusser. A cooperative switch determines the sign of synaptic plasticity in distal dendrites of neocortical pyramidal neurons. *Neuron*, 51(2):227–238, 2006.
- [11] Claudia Clopath, Lars Büsing, Eleni Vasilaki, and Wulfram Gerstner. Connectivity reflects coding: a model of voltage-based stdp with homeostasis. *Nat Neurosci*, 13(3):344–52, 2010.
- [12] Frédéric Gambino, Stéphane Pagès, Vassilis Kehayas, Daniela Baptista, Roberta Tatti, Alan Carleton, and Anthony Holtmaat. Sensory-evoked ltp driven by dendritic plateau potentials in vivo. *Nature*, 515(7525):116, 2014.
- [13] E.M. Izhikevich. Solving the distal reward problem through linkage of STDP and dopamine signaling. *Cerebral Cortex*, 17:2443–2452, 2007.
- [14] Geun Hee Seol, Jokubas Ziburkus, ShiYong Huang, Lihua Song, In Tae Kim, Kogo Takamiya, Richard L Huganir, Hey-Kyoung Lee, and Alfredo Kirkwood. Neuromodulators control the polarity of spike-timing-dependent synaptic plasticity. *Neuron*, 55(6):919–929, 2007.
- [15] Robert Legenstein, Dejan Pecevski, and Wolfgang Maass. A learning theory for reward-modulated spike-timing-dependent plasticity with application to biofeedback. *PLOS Comput. Biol.*, 4:e1000180, 2008.
- [16] Nicolas Frémaux, Henning Sprekeler, and Wulfram Gerstner. Functional requirements for reward-modulated spike-timing-dependent plasticity. *J Neurosci*, 30(40):13326–13337, 2010.

- 
- 682 [17] Johannes Friedrich and Máté Lengyel. Goal-directed decision making with spiking neurons. *J*  
683 *Neurosci*, 36(5):1529–1546, 2016.
- 684 [18] H Francis Song, Guangyu R Yang, and Xiao-Jing Wang. Reward-based training of recurrent neural  
685 networks for cognitive and value-based tasks. *Elife*, 6:e21492, 2017.
- 686 [19] Thomas Miconi. Biologically plausible learning in recurrent neural networks reproduces neural  
687 dynamics observed during cognitive tasks. *Elife*, 6:e20899, 2017.
- 688 [20] Yonathan Aljadeff, James D’Amour, Rachel E. Field, Robert C. Froemke, and Claudia Clopath.  
689 Cortical credit assignment by hebbian, neuromodulatory and inhibitory plasticity. *arxiv*, 2019.
- 690 [21] Wulfram Gerstner, Marco Lehmann, Vasiliki Liakoni, Dane Corneil, and Johanni Brea. Eligibility  
691 traces and plasticity on behavioral time scales: experimental support of neohebbian three-factor  
692 learning rules. *Front Neural Circuits*, 12, 2018.
- 693 [22] Ronald J Williams. Simple statistical gradient-following algorithms for connectionist reinforcement  
694 learning. *Machine learning*, 8(3-4):229–256, 1992.
- 695 [23] Justin Werfel, Xiaohui Xie, and H Sebastian Seung. Learning curves for stochastic gradient descent in  
696 linear feedforward networks. In *Advances in neural information processing systems*, pages 1197–1204,  
697 2004.
- 698 [24] Guillaume Bellec, Franz Scherr, Anand Subramoney, Elias Hajek, Darjan Salaj, Robert Legenstein,  
699 and Wolfgang Maass. A solution to the learning dilemma for recurrent networks of spiking neurons.  
700 *bioRxiv*, page 738385, 2019.
- 701 [25] Timothy P Lillicrap, Adam Santoro, Luke Marris, Colin J Akerman, and Geoffrey Hinton. Back-  
702 propagation and the brain. *Nature Reviews Neuroscience*, pages 1–12, 2020.
- 703 [26] Blake A Richards, Timothy Lillicrap, Philippe Beaudoin, Yoshua Bengio, Rafal Bogacz, Amelia  
704 Christensen, Claudia Clopath, Archy De Berker, Surya Ganguli, Colleen Gillon, Adam Hafner,  
705 Danijar Kepecs, Nikolaus Kriegeskorte, Peter Latham, Grace Lindsay, Richard Miller, Kenneth Naud,  
706 Christopher Pack, Panayiota Poirazi, Rui Ponte Costa, Pieter Roelfsema, João Sacramento, Andrew  
707 Saxe, Anna Schapiro, Walter Senn, Greg Wayne, Daniel Yamins, Friedemann Zenke, Denis Zylberberg,  
708 Joel Therien, and Konrad Kording. A deep learning framework for systems neuroscience. *Nat Neurosci*,  
709 2019.
- 710 [27] D. E. Rumelhard, J.L. McClelland, and the PDP research group. *Parallel distributed processing:  
711 Explorations in the microstructure of cognition. Vol. 1: Foundations*. MIT Press, Cambridge Mass.,  
712 1986.
- 713 [28] Konrad P Körding and Peter König. Supervised and unsupervised learning with two sites of synaptic  
714 integration. *J Comput. Neurosci.*, 11(3):207–215, 2001.
- 715 [29] Dong-Hyun Lee, Saizheng Zhang, Asja Fischer, and Yoshua Bengio. Difference target propagation.  
716 In *Joint European Conference on Machine Learning and Knowledge Discovery in Databases*, pages  
717 498–515. Springer, 2015.
- 718 [30] João Sacramento, Rui Ponte Costa, Yoshua Bengio, and Walter Senn. Dendritic cortical microcircuits  
719 approximate the backpropagation algorithm. In *Advances in Neural Information Processing Systems*,  
720 pages 8721–8732, 2018.
- 721 [31] Sergey Bartunov, Adam Santoro, Blake Richards, Luke Marris, Geoffrey E Hinton, and Timothy  
722 Lillicrap. Assessing the scalability of biologically-motivated deep learning algorithms and architectures.  
723 In *Advances in Neural Information Processing Systems*, pages 9368–9378, 2018.
-



- 
- 724 [32] Qianli Liao, Joel Z Leibo, and Tomaso Poggio. How important is weight symmetry in backpropaga-  
725 tion? In *Thirtieth AAAI Conference on Artificial Intelligence*, 2016.
- 726 [33] Will Xiao, Honglin Chen, Qianli Liao, and Tomaso Poggio. Biologically-plausible learning algorithms  
727 can scale to large datasets. *arXiv preprint arXiv:1811.03567*, 2018.
- 728 [34] Timothy P Lillicrap, Daniel Cownden, Douglas B Tweed, and Colin J Akerman. Random synaptic  
729 feedback weights support error backpropagation for deep learning. *Nature Commun.*, 7, 2016.
- 730 [35] Benjamin Scellier and Yoshua Bengio. Towards a biologically plausible backprop. *arXiv preprint*  
731 *arXiv:1602.05179*, 2016.
- 732 [36] Arash Samadi, Timothy P Lillicrap, and Douglas B Tweed. Deep learning with dynamic spiking  
733 neurons and fixed feedback weights. *Neural Comput.*, 29(3):578–602, 2017.
- 734 [37] Yali Amit. Deep learning with asymmetric connections and hebbian updates. *Frontiers in computa-*  
735 *tional neuroscience*, 13:18, 2019.
- 736 [38] James CR Whittington and Rafal Bogacz. Theories of error back-propagation in the brain. *Trends*  
737 *in cognitive sciences*, 23(3):235–250, 2019.
- 738 [39] Hesham Mostafa, Vishwajith Ramesh, and Gert Cauwenberghs. Deep supervised learning using  
739 local errors. *Frontiers in neuroscience*, 12:608, 2018.
- 740 [40] Jordan Guerguiev, Timothy P Lillicrap, and Blake A Richards. Towards deep learning with  
741 segregated dendrites. *eLife*, 6:e22901, 2017.
- 742 [41] Mohamed Akrouf, Collin Wilson, Peter C Humphreys, Timothy Lillicrap, and Douglas Tweed.  
743 Using weight mirrors to improve feedback alignment. *arXiv preprint arXiv:1904.05391*, 2019.
- 744 [42] Benjamin James Lansdell, Prashanth Ravi Prakash, and Konrad Paul Kording. Learning to solve  
745 the credit assignment problem. *arXiv preprint arXiv:1906.00889*, 2019.
- 746 [43] Isabella Pozzi, Sander Bohtë, and Pieter Roelfsema. A biologically plausible learning rule for deep  
747 learning in the brain. *arXiv preprint arXiv:1811.01768*, 2018.
- 748 [44] Axel Laborieux, Maxence Ernout, Benjamin Scellier, Yoshua Bengio, Julie Grollier, and Damien  
749 Querlioz. Scaling equilibrium propagation to deep convnets by drastically reducing its gradient  
750 estimator bias. *arXiv preprint arXiv:2006.03824*, 2020.
- 751 [45] ME Larkum, J Zhu, and B Sakmann. A new cellular mechanism for coupling inputs arriving at  
752 different cortical layers. *Nature*, 398:338–341, 1999.
- 753 [46] Alex Reyes, Rafael Lujan, Andrej Rozov, Nail Burnashev, Peter Somogyi, and Bert Sakmann.  
754 Target-cell-specific facilitation and depression in neocortical circuits. *Nat. Neurosci.*, 1(4):279–285,  
755 1998.
- 756 [47] Henry Markram, Yun Wang, and Misha Tsodyks. Differential signaling via the same axon of  
757 neocortical pyramidal neurons. *Proc. Natl. Acad. Sci. USA*, 95(9):5323–5328, 1998.
- 758 [48] Thomas Nevian and Bert Sakmann. Spine  $ca_2^+$  signaling in spike-timing-dependent plasticity. *J.*  
759 *Neurosci.*, 26(43):11001–11013, 2006.
- 760 [49] Robert C Froemke, Ishan A Tsay, Mohamad Raad, John D Long, and Yang Dan. Contribution of  
761 individual spikes in burst-induced long-term synaptic modification. *J. Neurophys.*, 95(3):1620–1629,  
762 2006.
-

- 
- 763 [50] Curtis C Bell, Angel Caputi, Kirsty Grant, and Jacques Serrier. Storage of a sensory pattern by  
764 anti-hebbian synaptic plasticity in an electric fish. *Proceedings of the National Academy of Sciences*,  
765 90(10):4650–4654, 1993.
- 766 [51] Kieran Bol, Gary Marsat, Erik Harvey-Girard, André Longtin, and Leonard Maler. Frequency-tuned  
767 cerebellar channels and burst-induced ltd lead to the cancellation of redundant sensory inputs. *Journal*  
768 *of Neuroscience*, 31(30):11028–11038, 2011.
- 769 [52] Salomon Z Muller, Abigail Zadina, LF Abbott, and Nate Sawtell. Continual learning in a multi-layer  
770 network of an electric fish. *Cell*, 2019.
- 771 [53] Guy Bouvier, David Higgins, Maria Spolidoro, Damien Carrel, Benjamin Mathieu, Clément Léna,  
772 Stéphane Dieudonné, Boris Barbour, Nicolas Brunel, and Mariano Casado. Burst-dependent bidirec-  
773 tional plasticity in the cerebellum is driven by presynaptic nmda receptors. *Cell Reports*, 15(1):104–116,  
774 2016.
- 775 [54] Blake A Richards and Timothy P Lillicrap. Dendritic solutions to the credit assignment problem.  
776 *Curr. Opin. Neurobiol.*, 54:28–36, 2019.
- 777 [55] Federico Brandalise and Urs Gerber. Mossy fiber-evoked subthreshold responses induce timing-  
778 dependent plasticity at hippocampal ca3 recurrent synapses. *Proceedings of the National Academy of*  
779 *Sciences*, 111(11):4303–4308, 2014.
- 780 [56] C Kayser, MA Montemurro, NK Logothetis, and S Panzeri. Spike-phase coding boosts and stabilizes  
781 information carried by spatial and temporal spike patterns. *Neuron*, 61(4):597–608, 2009.
- 782 [57] Thomas Akam and Dimitri M Kullmann. Oscillatory multiplexing of population codes for selective  
783 communication in the mammalian brain. *Nat. Rev. Neurosci.*, 15(2):111, 2014.
- 784 [58] David J Herzfeld, Yoshiko Kojima, Robijanto Soetedjo, and Reza Shadmehr. Encoding of action by  
785 the purkinje cells of the cerebellum. *Nature*, 526(7573):439, 2015.
- 786 [59] Richard Naud and Henning Sprekeler. Sparse bursts optimize information transmission in a  
787 multiplexed neural code. *Proc. Nat. Acad. Sci. (U.S.A.)*, 2018.
- 788 [60] Kendra S Burbank and Gabriel Kreiman. Depression-biased reverse plasticity rule is required for  
789 stable learning at top-down connections. *PLoS Comp. Biol.*, 8(3):e1002393, 2012.
- 790 [61] Kendra S Burbank. Mirrored stdp implements autoencoder learning in a network of spiking neurons.  
791 *PLoS Comp. Biol.*, 11(12):e1004566, 2015.
- 792 [62] Masanori Murayama, Enrique Pérez-Garci, Thomas Nevian, Tobias Bock, Walter Senn, and  
793 Matthew E Larkum. Dendritic encoding of sensory stimuli controlled by deep cortical interneurons.  
794 *Nature*, 457(7233):1137–1141, 2009.
- 795 [63] Friedemann Zenke and Surya Ganguli. Superspike: Supervised learning in multilayer spiking neural  
796 networks. *Neural Comput.*, 30(6):1514–1541, 2018.
- 797 [64] Dongsung Huh and Terrence J Sejnowski. Gradient descent for spiking neural networks. In *Advances*  
798 *in Neural Information Processing Systems*, pages 1433–1443, 2018.
- 799 [65] Pieter R Roelfsema and Arjen van Ooyen. Attention-gated reinforcement learning of internal  
800 representations for classification. *Neural Comput.*, 17(10):2176–2214, 2005.
- 801 [66] Björn Granseth, Erik Ahlstrand, and Sivert Lindström. Paired pulse facilitation of corticogeniculate  
802 epscs in the dorsal lateral geniculate nucleus of the rat investigated in vitro. *J. Physiol.*, 544(2):477–486,  
803 2002.
-

- 
- 804 [67] S Murray Sherman. Thalamocortical interactions. *Curr. Opin. Neurobiol.*, 22(4):575–579, 2012.
- 805 [68] W. Gerstner, R. Kempter, J.L. van Hemmen, and H. Wagner. A neuronal learning rule for  
806 sub-millisecond temporal coding. *Nature*, 383(6595):76–78, 1996.
- 807 [69] G. Bi and M. Poo. Synaptic Modifications in Cultured Hippocampal Neurons: Dependence on Spike  
808 Timing, Synaptic Strength, and Postsynaptic Cell Type. *Journal of Neuroscience*, 18(24):10464,  
809 1998.
- 810 [70] Rhiannon M Meredith, Anna M Floyer-Lea, and Ole Paulsen. Maturation of long-term potentiation  
811 induction rules in rodent hippocampus: role of gabaergic inhibition. *J Neurosci*, 23(35):11142–11146,  
812 2003.
- 813 [71] Yanis Inglebert, Johnatan Aljadeff, Nicolas Brunel, and Dominique Debanne. Altered spike timing-  
814 dependent plasticity rules in physiological calcium. *bioRxiv*, 2020.
- 815 [72] Björn M Kampa and Greg J Stuart. Calcium spikes in basal dendrites of layer 5 pyramidal neurons  
816 during action potential bursts. *J Neurosci*, 26(28):7424–32, 2006.
- 817 [73] Guy Doron, Jiyun N Shin, Naoya Takahashi, Christina Bocklisch, Salina Skenderi, Moritz Drueke,  
818 Lisa de Mont, Maria Toumazo, Moritz von Heimendahl, Michael Brecht, et al. Perirhinal input to  
819 neocortical layer 1 controls learning. *bioRxiv*, page 713883, 2019.
- 820 [74] CPJ De Kock and Bert Sakmann. High frequency action potential bursts ( $> 100$  hz) in l2/3 and  
821 l5b thick tufted neurons in anaesthetized and awake rat primary somatosensory cortex. *J. Physiol.*,  
822 586(14):3353–3364, 2008.
- 823 [75] Friedemann Zenke, Wulfram Gerstner, and Surya Ganguli. The temporal paradox of hebbian  
824 learning and homeostatic plasticity. *Curr. Opin. Neurobiol.*, 43:166–176, 2017.
- 825 [76] Tuomo Mäki-Marttunen, Nicolangelo Iannella, Andrew G Edwards, Gaute Einevoll, and Kim T  
826 Blackwell. A unified computational model for cortical post-synaptic plasticity. *eLife*, 9, 2020.
- 827 [77] J Pfister and Wulfram Gerstner. Triplets of spikes in a model of spike timing-dependent plasticity.  
828 *J Neurosci.*, Jan 2006.
- 829 [78] Elie L. Bienenstock, Leon N. Cooper, and Paul W. Munro. Theory for the development of neuron  
830 selectivity: Orientation specificity and binocular interaction in visual cortex. *Journal of Neuroscience*,  
831 2(1):32–48, 1982.
- 832 [79] Matthew E Larkum and J Julius Zhu. Signaling of layer 1 and whisker-evoked  $ca^{2+}$  and  $na^{+}$  action  
833 potentials in distal and terminal dendrites of rat neocortical pyramidal neurons in vitro and in vivo.  
834 *Journal of neuroscience*, 22(16):6991–7005, 2002.
- 835 [80] Ning-long Xu, Mark T Harnett, Stephen R Williams, Daniel Huber, Daniel H O’Connor, Karel  
836 Svoboda, and Jeffrey C Magee. Nonlinear dendritic integration of sensory and motor input during an  
837 active sensing task. *Nature*, 492(7428):247–251, 2012.
- 838 [81] Lee N Fletcher and Stephen R Williams. Neocortical topology governs the dendritic integrative  
839 capacity of layer 5 pyramidal neurons. *Neuron*, 101(1):76–90, 2019.
- 840 [82] Larry Cauller. Layer i of primary sensory neocortex: where top-down converges upon bottom-up.  
841 *Behavioural brain research*, 71(1):163–170, 1995.
- 842 [83] D.J. Felleman and D.C. van Essen. Distributed hierarchical processing in the primate cerebral  
843 cortex. *Cereb. Cortex*, 1:1–47, 1991.
-

- 
- 844 [84] Y. Wang, A. Gupta, M. Toledo-Rodriguez, C.Z. Wu, and H. Markram. Anatomical, physiological,  
845 molecular and circuit properties of nest basket cells in the developing somatosensory cortex. *Cerebral*  
846 *Cortex*, 12:395–410, 2002.
- 847 [85] Simon X Chen, An Na Kim, Andrew J Peters, and Takaki Komiyama. Subtype-specific plasticity of  
848 inhibitory circuits in motor cortex during motor learning. *Nat. Neurosci.*, 18(8):1109–1115, 2015.
- 849 [86] Sabine Krabbe, Enrica Paradiso, Simon d’Aquin, Yael Bitterman, Julien Courtin, Chun Xu, Keisuke  
850 Yonehara, Milica Markovic, Christian Müller, Tobias Eichlisberger, et al. Adaptive disinhibitory  
851 gating by vip interneurons permits associative learning. *Nat. Neurosci.*, pages 1–10, 2019.
- 852 [87] Yan Yang and Stephen G Lisberger. Purkinje-cell plasticity and cerebellar motor learning are graded  
853 by complex-spike duration. *Nature*, 510(7506):529, 2014.
- 854 [88] Vinay Parikh, Rouba Kozak, Vicente Martinez, and Martin Sarter. Prefrontal acetylcholine release  
855 controls cue detection on multiple timescales. *Neuron*, 56(1):141–154, 2007.
- 856 [89] Aleksey V Zaitsev and Roger Anwyl. Inhibition of the slow afterhyperpolarization restores the  
857 classical spike timing-dependent plasticity rule obeyed in layer 2/3 pyramidal cells of the prefrontal  
858 cortex. *J. Neurophys.*, 107(1):205–215, 2011.
- 859 [90] Alfonso Renart, Nicolas Brunel, and Xiao-Jing Wang. Mean-field theory of irregularly spiking  
860 neuronal populations and working memory in recurrent cortical networks. *Computational neuroscience:*  
861 *A comprehensive approach*, pages 431–490, 2004.
- 862 [91] Olivier D Faugeras, Jonathan D Touboul, and Bruno Cessac. A constructive mean-field analysis of  
863 multi population neural networks with random synaptic weights and stochastic inputs. *Frontiers in*  
864 *computational neuroscience*, 3:1, 2009.
- 865 [92] Tilo Schwalger, Moritz Deger, and Wulfram Gerstner. Towards a theory of cortical columns:  
866 From spiking neurons to interacting neural populations of finite size. *PLoS computational biology*,  
867 13(4):e1005507, 2017.
- 868 [93] Xin Wang, Yichun Wei, Vishal Vaingankar, Qingbo Wang, Kilian Koepsell, Friedrich T Sommer,  
869 and Judith A Hirsch. Feedforward excitation and inhibition evoke dual modes of firing in the cat’s  
870 visual thalamus during naturalistic viewing. *Neuron*, 55(3):465–478, 2007.
- 871 [94] Scott F Owen, Joshua D Berke, and Anatol C Kreitzer. Fast-spiking interneurons supply feedforward  
872 control of bursting, calcium, and plasticity for efficient learning. *Cell*, 172(4):683–695, 2018.
- 873 [95] Brent Doiron, Ashok Litwin-Kumar, Robert Rosenbaum, Gabriel K Ocker, and Krešimir Josić. The  
874 mechanics of state-dependent neural correlations. *Nat. Neurosci.*, 19(3):383, 2016.
- 875 [96] David E. Rumelhart, Geoffrey E. Hinton, and Ronald J. Williams. Learning representations by  
876 back-propagating errors. *Nature*, 323:533–536, 1986.
- 877 [97] John F Kolen and Jordan B Pollack. Backpropagation without weight transport. In *Proceedings of*  
878 *1994 IEEE International Conference on Neural Networks (ICNN’94)*, volume 3, pages 1375–1380.  
879 IEEE, 1994.
- 880 [98] Maya Sandler, Yoav Shulman, and Jackie Schiller. A novel form of local plasticity in tuft dendrites  
881 of neocortical somatosensory layer 5 pyramidal neurons. *Neuron*, 90(5):1028–1042, 2016.
- 882 [99] Jordan Guerguiev, Konrad P Kording, and Blake A Richards. Spike-based causal inference for  
883 weight alignment. *arXiv preprint arXiv:1910.01689*, 2019.
- 884 [100] Katie C Bittner, Aaron D Milstein, Christine Grienberger, Sandro Romani, and Jeffrey C Magee.  
885 Behavioral time scale synaptic plasticity underlies ca1 place fields. *Science*, 357(6355):1033–1036,  
886 2017.
-

- 
- 887 [101] Martin Boerlin, Christian K Machens, and Sophie Denève. Predictive coding of dynamical variables  
888 in balanced spiking networks. *PLoS Comp. Biol.*, 9(11):e1003258, 2013.
- 889 [102] Grace W Lindsay and Kenneth D Miller. How biological attention mechanisms improve task  
890 performance in a large-scale visual system model. *eLife*, 7:e38105, 2018.
- 891 [103] Naoya Takahashi, Thomas G. Oertner, Peter Hegemann, and Matthew E. Larkum. Active cortical  
892 dendrites modulate perception. *Science*, 354(6319):1587–1590, 2016.
- 893 [104] Thilo Womelsdorf, Salva Ardid, Stefan Everling, and Taufik A Valiante. Burst firing synchronizes  
894 prefrontal and anterior cingulate cortex during attentional control. *Current Biology*, 24(22):2613–2621,  
895 2014.
- 896 [105] Henry Markram, Eilif Muller, Srikanth Ramaswamy, Michael W Reimann, Marwan Abdellah,  
897 Carlos Aguado Sanchez, Anastasia Ailamaki, Lidia Alonso-Nanclares, Nicolas Antille, Selim Arsever,  
898 et al. Reconstruction and simulation of neocortical microcircuitry. *Cell*, 163(2):456–492, 2015.
- 899 [106] Michael Hawrylycz, Costas Anastassiou, Anton Arkhipov, Jim Berg, Michael Buice, Nicholas Cain,  
900 Nathan W Gouwens, Sergey Gratiy, Ramakrishnan Iyer, Jung Hoon Lee, et al. Inferring cortical  
901 function in the mouse visual system through large-scale systems neuroscience. *Proceedings of the*  
902 *National Academy of Sciences*, 113(27):7337–7344, 2016.
- 903 [107] Leopoldo Petreanu, Tianyi Mao, Scott M Sternson, and Karel Svoboda. The subcellular organization  
904 of neocortical excitatory connections. *Nature*, 457(7233):1142–5, Feb 2009.
- 905 [108] Si-Qiang Ren, Zhizhong Li, Susan Lin, Matteo Bergami, and Song-Hai Shi. Precise long-range  
906 microcircuit-to-microcircuit communication connects the frontal and sensory cortices in the mam-  
907 malian brain. *Neuron*, 104(2):385 – 401.e3, 2019.
- 908 [109] Federico W Grillo, Guilherme Neves, Alison Walker, Gema Vizcay-Barrena, Roland A Fleck,  
909 Tiago Branco, and Juan Burrone. A distance-dependent distribution of presynaptic boutons tunes  
910 frequency-dependent dendritic integration. *Neuron*, 99(2):275–282, 2018.
- 911 [110] Jacob Devlin, Ming-Wei Chang, Kenton Lee, and Kristina Toutanova. Bert: Pre-training of deep  
912 bidirectional transformers for language understanding. *arXiv preprint arXiv:1810.04805*, 2018.
- 913 [111] Tengda Han, Weidi Xie, and Andrew Zisserman. Video representation learning by dense predictive  
914 coding. In *Proceedings of the IEEE International Conference on Computer Vision Workshops*, pages  
915 0–0, 2019.
- 916 [112] Nace L Golding, Nathan P Staff, and Nelson Spruston. Dendritic spikes as a mechanism for  
917 cooperative long-term potentiation. *Nature*, 418(6895):326–331, 2002.
- 918 [113] Jacopo Bono and Claudia Clopath. Modeling somatic and dendritic spike mediated plasticity at  
919 the single neuron and network level. *Nat. Commun.*, 8(1):706, 2017.
- 920 [114] Friedemann Zenke and Wulfram Gerstner. Limits to high-speed simulations of spiking neural  
921 networks using general-purpose computers. *Frontiers Neuroinfo.*, 8:76, 2014.
- 922 [115] Joseph Bastian and Jerry Nguyenkim. Dendritic modulation of burst-like firing in sensory neurons.  
923 *J. Neurophys.*, 85(1):10–22, 2001.
- 924 [116] Robin Tremblay, Soohyun Lee, and Bernardo Rudy. Gabaergic interneurons in the neocortex: from  
925 cellular properties to circuits. *Neuron*, 91(2):260–292, 2016.
- 926 [117] Maximiliano José Nigro, Yoshiko Hashikawa-Yamasaki, and Bernardo Rudy. Diversity and con-  
927 nectivity of layer 5 somatostatin-expressing interneurons in the mouse barrel cortex. *Journal of*  
928 *Neuroscience*, 38(7):1622–1633, 2018.
-

- 929 [118] Markus M. Hilscher, Richardson N. Leão, Steven J. Edwards, Katarina E. Leão, and Klas Kullander.  
930 Chrna2-martinotti cells synchronize layer 5 type a pyramidal cells via rebound excitation. *PLOS*  
931 *Biology*, 15(2):1–26, 02 2017.
- 932 [119] R Naud, N Marcille, C Clopath, and Wulfram Gerstner. Firing patterns in the adaptive exponential  
933 integrate-and-fire model. *Biol Cybern*, 99:335–347, 2008.
- 934 [120] Adam M Packer and Rafael Yuste. Dense, unspecific connectivity of neocortical parvalbumin-  
935 positive interneurons: a canonical microcircuit for inhibition? *Journal of Neuroscience*, 31(37):13260–  
936 13271, 2011.
- 937 [121] Rui P Costa, P Jesper Sjöström, and Mark CW Van Rossum. Probabilistic inference of short-term  
938 synaptic plasticity in neocortical microcircuits. *Front. Comput. Neurosci.*, 7, 2013.
- 939 [122] Alex Krizhevsky, Vinod Nair, and Geoffrey Hinton. Cifar-10 (canadian institute for advanced  
940 research). Technical report, University of Toronto, 2009.
- 941 [123] J. Deng, W. Dong, R. Socher, L.-J. Li, K. Li, and L. Fei-Fei. ImageNet: A Large-Scale Hierarchical  
942 Image Database. In *CVPR09*, 2009.
- 943 [124] Kaiming He, Xiangyu Zhang, Shaoqing Ren, and Jian Sun. Delving deep into rectifiers: Surpassing  
944 human-level performance on imagenet classification. In *Proceedings of the IEEE international*  
945 *conference on computer vision*, pages 1026–1034, 2015.
- 946 [125] Xavier Glorot and Yoshua Bengio. Understanding the difficulty of training deep feedforward neural  
947 networks. In *Proceedings of the thirteenth international conference on artificial intelligence and*  
948 *statistics*, pages 249–256, 2010.
- 949 [126] David E Rumelhart, Geoffrey E Hinton, and Ronald J Williams. Learning representations by  
950 back-propagating errors. *nature*, 323(6088):533–536, 1986.
- 951 [127] Arild Nøkland. Direct feedback alignment provides learning in deep neural networks. In *Advances*  
952 *in neural information processing systems*, pages 1037–1045, 2016.
- 953 [128] Xiaohui Xie and H Sebastian Seung. Equivalence of backpropagation and contrastive hebbian  
954 learning in a layered network. *Neural Comput.*, 15(2):441–454, 2003.
